# Supplementary material for: Associative vs. dissociative binding of CO 2 on M 5 transition metal clusters
Source: Royal Society of Chemistry journal article supplement (doi:10.1039/d5cp03418c), 2025-12-09
Supplement: d5cp03418c1.xlsx [file d5cp03418c1.xlsx]

## Sheet: Nb5
B3P86/sdd
a.u. to eV	27.2116
CO2	-188.923												Physisorbed											-188.695
Zero	-475.117												axial	k0078	-475.129	-0.31631
													eq_centre	k0071	-475.135	-0.48339
Nb5		assoc_CO2		chair_CO2		dissoc_CO2		chair_CO2_TS					eq_side	k0067	-475.135	-0.490737
Kick0067	-286.118	Kick0078	-475.129	Kick0055	-475.129	Kick0080	-475.129	Kick0041	-475.129
Kick0026	-286.195	Kick0054	-475.129	Kick0022	-475.135	Kick0097	-475.136	Kick0019	-475.131
		Kick0071	-475.135	Kick0091	-475.136	Kick0000	-475.147	Kick0008	-475.135
		Kick0070	-475.135	Kick0082	-475.139	Kick0096	-475.18	Kick0050	-475.135
		Kick0067	-475.135	Kick0052	-475.142	Kick0072	-475.183	Kick0068	-475.14
		Kick0023	-475.18	Kick0041	-475.18	Kick0076	-475.189	Kick0069	-475.177
		Kick0011	-475.187	Kick0047	-475.182	Kick0018	-475.196	Kick0036	-475.183
		Kick0042	-475.199	Kick0061	-475.199	Kick0051	-475.199	Kick0066	-475.192
		Kick0019	-475.199	Kick0046	-475.203	Kick0016	-475.208	Kick0044	-475.193
		Kick0089	-475.203	Kick0058	-475.205	Kick0093	-475.228	Kick0064	-475.194
		Kick0000	-475.208	Kick0092	-475.206	Kick0056	-475.23	Kick0062	-475.198
		Kick0069	-475.208	Kick0038	-475.208	Kick0064	-475.232	Kick0053	-475.199
		Kick0030	-475.209	Kick0079	-475.208	Kick0030	-475.233	Kick0027	-475.218
		Kick0075	-475.22	Kick0034	-475.208	Kick0025	-475.24	Kick0031	-475.25
		Kick0059	-475.22	Kick0011	-475.209	Kick0027	-475.242
		Kick0038	-475.228	Kick0053	-475.215	Kick0053	-475.245
		Kick0061	-475.252	Kick0027	-475.217	Kick0079	-475.248						B3P86/sdd													TPSSTPSS/Def2TZVP
		Kick0049	-475.264	Kick0050	-475.22	Kick0095	-475.252
		Kick0055	-475.272	Kick0031	-475.221	Kick0014	-475.253							0,2	0,4	0,6	0,8
		Kick0047	-475.28	Kick0045	-475.226	Kick0062	-475.255						Nb5	-286.195	-286.185	-286.155	-286.138									-284.813	-284.805	-284.782	-284.754
		Kick0072	-475.284	Kick0073	-475.252	Kick0026	-475.256						Nb5 + CO2	-475.117	-475.108	-475.078	-475.061		0	0.257593	1.06992	1.53563				-473.508	-473.5	-473.477	-473.448		0	0.221829	0.843668	1.61819
		Kick0033	-475.284	Kick0081	-475.255	Kick0052	-475.256						g1	-475.135	-475.126	-475.104	-475.079	g1	-0.483394	-0.239039	0.358718	1.0425				-473.589	-473.588				-2.21567	-2.16742
		Kick0035	-475.288	Kick0007	-475.272	Kick0069	-475.26						ts1	-475.138	-475.139	-475.116	-475.096	ts1	-0.573334	-0.594797	0.0288226	0.590693		-0.0899399		-473.51	-473.509				-0.0557756	-0.0373262
		Kick0088	-475.298	Kick0029	-475.275	Kick0023	-475.263						g2	-475.208	-475.197	-475.185	-475.153	g2	-2.46252	-2.18105	-1.84241	-0.96922				-473.589	-473.575				-2.2161	-1.8155
		Kick0041	-475.334	Kick0099	-475.277	Kick0084	-475.263						ts2	-475.198	-475.192	-475.161	-475.143	ts2	-2.19918	-2.03043	-1.17817	-0.711065		0.263341		-473.577	-473.573				-1.89109	-1.78298
				Kick0026	-475.277	Kick0002	-475.267						g3	-475.228	-475.209	-475.19	-475.167	g3	-3.00264	-2.49506	-1.97385	-1.35308				-473.607	-473.588				-2.68477	-2.19009
				Kick0093	-475.28	Kick0086	-475.268						ts3	-475.199	-475.182	-475.164	-475.159	ts3	-2.21482	-1.76382	-1.27142	-1.13159		0.787827		-473.638	-473.631				-3.53742	-3.34092
				Kick0067	-475.282	Kick0005	-475.268						g4	-475.215	-475.201	-475.197	-475.169	g4	-2.65426	-2.28585	-2.16625	-1.41866				-473.594	-473.574				-2.33505	-1.81041
				Kick0066	-475.283	Kick0050	-475.27						ts4	-475.267	-475.26	-475.245	-475.213	ts4	-4.06886	-3.89568	-3.47142	-2.61266		-1.4146		-473.638	-473.631				-3.53742	-3.34092
				Kick0090	-475.284	Kick0085	-475.27						g5	-475.366	-475.36	-475.336	-475.303	g5	-6.77766	-6.61181	-5.95447	-5.042				-473.727	-473.721				-5.96309	-5.79432
				Kick0063	-475.284	Kick0057	-475.273						ts3b	-475.194	-475.188	-475.175	-475.154	ts3b	-2.08686	-1.93297	-1.56634	-1.00603		0.127955		-473.589	-473.567				-2.21254	-1.59761
				Kick0030	-475.298	Kick0074	-475.275						g4b	-475.28	-475.278	-475.26	-475.231	g4b	-4.43553	-4.3746	-3.88125	-3.08676				-473.656	-473.645				-4.01925	-3.72828
				Kick0037	-475.34	Kick0003	-475.276						ts4b	-475.262	-475.252	-475.235	-475.205	ts4b	-3.92767	-3.67087	-3.20409	-2.39299		0.507861		-473.628	-473.626				-3.281	-3.21923
				Kick0084	-475.34	Kick0035	-475.277						g5b	-475.34	-475.319	-475.328	-475.295	g5b	-6.05229	-5.48709	-5.73571	-4.84526				-473.697	-473.676				-5.13964	-4.56602
						Kick0089	-475.278						ts5b	-475.338	-475.317	-475.286	-475.26	ts5b	-6.01258	-5.42321	-4.59703	-3.88497		0.0397099		-473.696	-473.676				-5.10799	-4.56223
						Kick0088	-475.28						g6b	-475.363	-475.351	-475.328	-475.295	g6b	-6.68019	-6.37298	-5.73587	-4.84529				-473.726	-473.712				-5.93305	-5.56814
						Kick0087	-475.28						ts6b	-475.323	-475.322	-475.286	-475.26	ts6b	-5.60048	-5.56255	-4.59703	-3.88497		1.07972		-473.698	-473.683				-5.16558	-4.77183
						Kick0082	-475.281
						Kick0071	-475.283							r(CO)	r(CO)	theta(OCO)	v_bend	v_bend	v_symm_stretch	v_asym_stretch	v_imag	E(HOMO)	E(LUMO)	q(M5)	q(CO2)	E_ads	E_int
						Kick0081	-475.283						M5									-0.16666	-0.10465
						Kick0098	-475.284						g1	1.182	1.193	179.96	553.566	576.876	1276.59	2340.64		-0.15919	-0.10033	-0.141916	0.141914	-0.483394	-0.483751
						Kick0043	-475.284						ts1	1.222	1.327	132.17	371.731	709.099	1109.56	1726.45	-56.8589	-0.18717	-0.13278	0.417899	-0.417798	-0.573334	1.21232
						Kick0039	-475.287						g2	1.282	1.312	132.67	482.357	707.436	1132.45	1541.25		-0.18243	-0.11599	0.496533	-0.496582	-2.46252	-0.443723
						Kick0008	-475.289						ts2	1.266	1.372	127.19	466.87	697.034	994.1	1516.04	-66.7277	-0.19401	-0.1161	0.589818	-0.58988	-2.19918	0.206811
						Kick0092	-475.293						g3	1.39	1.404	116.34	567.559	626.467	988.47	1056.69		-0.18108	-0.11851	0.640701	-0.640929	-3.00264	1.15161
						Kick0073	-475.298						ts3	1.7	4.173	72.92	485.384	607.32	631.485	716.534	-366.073	-0.17221	-0.11299	1.04994	-1.05032	-2.21482	10.4385
						Kick0020	-475.298						g4	1.284	3.396	92.93	490.289	611.477	887.332	1398.5		-0.19439	-0.12701	0.785286	-0.78538	-2.65426	5.15582
						Kick0075	-475.301						ts4	1.7	4.173	72.92	485.384	607.32	631.485	716.534	-330.749	-0.17221	-0.11299	1.04994	-1.05032	-4.06886	8.58442
						Kick0028	-475.308						g5	2.77	3.657	68.78	600.448	671.546	672.574	700.779		-0.16848	-0.11514	1.27267	-1.27273	-6.77766	12.4864
						Kick0015	-475.328						ts3b	1.296	1.692	121.26	462.646	558.813	609.973	1359.86	-335.632	-0.17902	-0.12054	0.648676	-0.649007	-2.08686	2.92543
						Kick0047	-475.349						g4b	1.34	3.595	122.14	500.212	623.667	673.794	1215.85		-0.17605	-0.11575	0.925583	-0.925566	-4.43553	4.13101
						Kick0037	-475.352						ts4b	1.89	3.468	77.67	566.113	653.681	696.826	747.192	-475.585	-0.18228	-0.1154	1.00804	-1.00798	-3.92767	10.2802
						Kick0010	-475.36						g5b	3.39	3.925	81.83	602.964	682.896	764.59	901.689		-0.18045	-0.12197	1.25915	-1.25893	-6.05229	14.2616
						Kick0040	-475.361						ts5b	3.08	3.576	83.78	639.53	681.548	720.697	866.314	-140.195	-0.17016	-0.11666	1.2432	-1.24328	-6.01258	13.8512
						Kick0029	-475.363	0.0361914					g6b	2.937	3.352	108.55	613.392	678.053	679.941	692.952		-0.16939	-0.11563	1.25065	-1.25074	-6.68019	13.2704
													ts6b	2.93	2.882	89.5	595.923	647.503	682.482	690.054	-64.74	-0.16584	-0.10944	1.26487	-1.26507	-5.60048	13.7038
						ap_g_t1mr	-475.366	-0.0976352
																						q(M5)	q(CO2)		E(M5)	E(CO2)	E_int
														q(M)					q(C)	q(O)	q(O)
													M5	0.044852	0.064569	-0.077265	0.045288	-0.07742	0.327958	-0.163971	-0.163971
													g1	0.022555	0.008742	-0.101003	0.028947	-0.101157	0.368606	-0.112037	-0.114655	-0.141916	0.141914		-286.195	-188.922	-0.483751
													ts1	0.070981	0.071033	0.071833	0.211788	-0.007736	0.099783	-0.273246	-0.244335	0.417899	-0.417798		-286.186	-188.848	1.21232
													g2	0.068246	0.066245	0.183061	0.223394	-0.044413	0.052053	-0.273594	-0.275041	0.496533	-0.496582		-286.191	-188.845	-0.443723
													ts2	0.158246	0.043372	0.175312	0.234004	-0.021116	0.013485	-0.299646	-0.303719	0.589818	-0.58988		-286.182	-188.821	0.206811
													g3	0.246063	0.228476	0.166835	0.00653	-0.007203	-0.053209	-0.295732	-0.291988	0.640701	-0.640929		-286.183	-188.758	1.15161
													ts3	0.412444	0.191451	0.278748	-0.021961	0.189258	-0.290102	-0.318784	-0.441434	1.04994	-1.05032		-286.169	-188.432	10.4385
													g4	0.283067	0.264556	0.182091	0.017293	0.038279	-0.133083	-0.223874	-0.428423	0.785286	-0.78538		-286.165	-188.606	5.15582
													ts4	0.412444	0.191451	0.278748	-0.021961	0.189258	-0.290102	-0.318784	-0.441434	1.04994	-1.05032		-286.169	-188.432	8.58442
													g5	0.546772	0.152254	0.377014	-0.006581	0.203208	-0.438213	-0.409695	-0.42482	1.27267	-1.27273		-286.149	-188.169	12.4864
													ts3b	-0.016113	0.196202	-0.039392	0.291155	0.216824	-0.053266	-0.340356	-0.255385	0.648676	-0.649007		-286.178	-188.722	2.92543
													g4b	0.006589	0.242112	0.082265	0.379473	0.215144	-0.202719	-0.435893	-0.286954	0.925583	-0.925566		-286.174	-188.587	4.13101
													ts4b	-0.047338	0.282294	0.158323	0.382254	0.232511	-0.30275	-0.372206	-0.333021	1.00804	-1.00798		-286.158	-188.364	10.2802
													g5b	0.006502	0.354004	0.256718	0.324932	0.316996	-0.449381	-0.373447	-0.436103	1.25915	-1.25893		-286.147	-188.128	14.2616
													ts5b	-0.034462	0.36269	0.262762	0.386788	0.265423	-0.448497	-0.360898	-0.433885	1.2432	-1.24328		-286.144	-188.142	13.8512
													g6b	-0.017022	0.385294	0.330965	0.334343	0.217073	-0.447965	-0.384423	-0.418355	1.25065	-1.25074		-286.158	-188.153	13.2704
													ts6b	0.442222	0.310119	0.35773	-0.006969	0.161767	-0.425923	-0.4291	-0.410051	1.26487	-1.26507		-286.155	-188.174	13.7038

## Sheet: Mo5
B3P86/sdd
a.u. to eV	27.2116
CO2	-188.923																								-188.695
Zero	-531.396
Mo5		assoc_CO2		chair_CO2		dissoc_CO2		chair_CO2_TS
Kick0062	-342.397	Kick0009	-531.413	Kick0059	-531.413	Kick0020	-531.428	Kick0015	-531.274
Kick0000	-342.408	Kick0098	-531.413	Kick0030	-531.413	Kick0065	-531.434	Kick0055	-531.282
Kick0028	-342.41	Kick0062	-531.413	Kick0055	-531.418	Kick0071	-531.443	Kick0024	-531.356
Kick0050	-342.427	Kick0001	-531.413	Kick0016	-531.441	Kick0096	-531.446	Kick0020	-531.396
Kick0049	-342.439	Kick0055	-531.418	Kick0051	-531.451	Kick0052	-531.447	Kick0051	-531.405
Kick0026	-342.473	Kick0041	-531.418	Kick0052	-531.465	Kick0018	-531.447	Kick0000	-531.405
Kick0089	-342.474	Kick0080	-531.451	Kick0024	-531.465	Kick0009	-531.45	Kick0048	-531.409
		Kick0044	-531.465	Kick0037	-531.469	Kick0036	-531.45	Kick0001	-531.411
	-0.958665	Kick0029	-531.465	Kick0012	-531.471	Kick0063	-531.453	Kick0075	-531.412
		Kick0013	-531.465	Kick0036	-531.472	Kick0099	-531.453	Kick0073	-531.418
		Kick0069	-531.469	Kick0095	-531.474	Kick0091	-531.465	Kick0057	-531.421
		Kick0084	-531.472	Kick0067	-531.474	Kick0079	-531.468	Kick0003	-531.433
		Kick0011	-531.474	Kick0029	-531.474	Kick0081	-531.472	Kick0052	-531.434
		Kick0047	-531.474	Kick0069	-531.484	Kick0072	-531.474	Kick0010	-531.439					B3P86/sdd													TPSSTPSS/Def2TZVP
		Kick0091	-531.474	Kick0034	-531.485	Kick0090	-531.477	Kick0042	-531.447
		Kick0093	-531.482	Kick0015	-531.489	Kick0061	-531.478	Kick0050	-531.448						0,1	0,3	0,5	0,7
		Kick0014	-531.484	Kick0023	-531.491	Kick0029	-531.481	Kick0034	-531.449					Mo5	-342.474	-342.478	-342.472	-342.423									-341.005	-341.001	-340.989	-340.963
		Kick0000	-531.485	Kick0080	-531.501	Kick0095	-531.482	Kick0017	-531.454					Mo5 + CO2	-531.396	-531.4	-531.395	-531.346		0	-0.100593	0.0457291	1.38158				-529.699	-529.695	-529.683	-529.658		0	0.105935	0.441971	1.13366
		Kick0085	-531.485	Kick0078	-531.508	Kick0087	-531.484	Kick0099	-531.455					g1	-531.413	-531.416	-531.41	-531.364	g1	-0.438067	-0.517894	-0.370432	0.885272				-529.709	-529.767	-529.693	-529.669		-0.269577	-1.84529	0.168094	0.824084
		Kick0024	-531.489	Kick0084	-531.512	Kick0046	-531.485	Kick0083	-531.456					ts1	-531.45	-531.446	-531.429	-531.407	ts1	-1.45509	-1.35385	-0.88299	-0.286413		-1.01702		-529.741	-529.736	-529.713	-529.682		-1.13074	-0.987011	-0.369661	0.468374
		Kick0090	-531.491	Kick0096	-531.514	Kick0064	-531.486	Kick0078	-531.463					g2	-531.516	-531.516	-531.505	-531.47	g2	-3.25662	-3.25136	-2.95799	-2.01079				-529.804	-529.802	-529.782	-529.756		-2.85419	-2.8029	-2.2536	-1.54036
		Kick0063	-531.491	Kick0044	-531.52	Kick0042	-531.489	Kick0084	-531.465					ts2	-531.473	-531.489	-531.477	-531.46	ts2	-2.09166	-2.50762	-2.20225	-1.73996		1.16496		-529.768	-529.78	-529.766	-529.738		-1.86894	-2.19088	-1.80739	-1.053
		Kick0094	-531.493	Kick0083	-531.531	Kick0097	-531.492	Kick0044	-531.47					g3	-531.49	-531.496	-531.489	-531.466	g3	-2.54677	-2.71653	-2.50506	-1.88192				-529.785	-529.786	-529.772	-529.751		-2.32277	-2.3655	-1.97974	-1.40683
		Kick0073	-531.501	Kick0093	-531.541	Kick0059	-531.493	Kick0046	-531.474					ts4	-531.545	-531.543	-531.536	-531.549	ts4	-4.04137	-3.98079	-3.78625	-4.14353		-1.49459		-529.831	-529.823	-529.813	-529.824		-3.58931	-3.3554	-3.10402	-3.39165
		Kick0004	-531.509			Kick0089	-531.494							g4	-531.498	-531.502	-531.497	-531.476	g4	-2.76738	-2.87822	-2.72171	-2.15765				-529.802	-529.784	-529.777	-529.751		-2.78153	-2.31009	-2.11134	-1.4163
		Kick0017	-531.512			Kick0070	-531.5							ts4	-531.545	-531.543	-531.536	-531.549	ts4	-4.04137	-3.98079	-3.78625	-4.14353		-1.27398		-529.831	-529.823	-529.813	-529.824		-3.58931	-3.3554	-3.10402	-3.39165
		Kick0031	-531.527			Kick0016	-531.501							g5	-531.577	-531.575	-531.562	-531.552	g5	-4.90504	-4.84688	-4.50779	-4.24049				-529.86	-529.853	-529.832	-529.815		-4.37545	-4.17422	-3.61832	-3.13648
		Kick0079	-531.531			Kick0078	-531.502				-531.567			ts4b	-531.477	-531.49	-531.494	-531.471	ts4b	-2.19399	-2.55327	-2.66186	-2.01845		2.71106		-529.765	-529.77	-529.764	-529.742		-1.77658	-1.91196	-1.75269	-1.16753
		Kick0081	-531.541			Kick0047	-531.505							g5b	-531.567	-531.564	-531.554	-531.559	g5b	-4.63534	-4.55239	-4.29877	-4.4119				-529.851	-529.836	-529.823	-529.818		-4.13379	-3.72591	-3.36699	-3.2357
		Kick0096	-531.564			Kick0007	-531.508
		Kick0006	-531.567			Kick0066	-531.509
						Kick0025	-531.509								r(CO)	r(CO)	theta(OCO)	v_bend	v_bend	v_symm_stretch	v_asym_stretch	v_imag	E(HOMO)	E(LUMO)	q(M5)	q(CO2)	E_ads	E_int
						Kick0021	-531.512							M5									-0.16899	-0.09599
						Kick0074	-531.512							g1	1.184	1.19	179.98	560.149	560.218	1279.39	2339.97		-0.16124	-0.08841	-0.118505	0.118497	-0.438067	-0.438723
						Kick0050	-531.512							ts1	1.191	1.8	122.03	441.932	508.062	767.214	1888.46	-355.913	-0.1877	-0.12791	0.494113	-0.494124	-1.45509	3.81188
						Kick0075	-531.515							g2	1.249	3.509	140.78	484.594	520.983	929.37	1574.6		-0.19446	-0.13621	0.79506	-0.795062	-3.25662	4.09709
						Kick0093	-531.516							ts2	1.329	3.655	93.45	465.174	566.397	907.95	1237.05	-239.742	-0.19025	-0.13335	0.837493	-0.837384	-2.09166	5.62081
						Kick0011	-531.516							g3	1.359	4.025	79.73	453.697	640.91	917.795	1083.58		-0.19477	-0.13197	0.8447	-0.844665	-2.54677	5.83979
						Kick0022	-531.519							ts3	3.183	4.215	50.86	634.663	687.737	730.01	954.667	-165.196	-0.20475	-0.13264	1.11372	-1.11382	-4.04137	15.3419
						Kick0033	-531.52							g4	1.382	4.04	63.77	560.83	636.042	944.595	1038.64		-0.19035	-0.12821	0.869179	-0.869354	-2.76738	4.52323
						Kick0056	-531.52							ts4	3.183	4.215	50.86	634.663	687.737	730.01	954.667	-157.677	-0.20475	-0.13264	1.11372	-1.11382	-4.04137	15.3419
						Kick0038	-531.52							g5	3.714	4.84	44.41	632.159	704.558	734.357	936.92		-0.1973	-0.13465	1.18334	-1.18333	-4.90504	15.1758
						Kick0031	-531.521							ts4b	1.59	4.027	62.77	556.952	633.998	665.461	937.039	-120.028	-0.19469	-0.14018	0.945387	-0.945341	-2.19399	8.0281
						Kick0039	-531.523							g5b	3.34	3.446	59.2	640.873	659.743	722.159	939.545		-0.2076	-0.13544	1.15704	-1.15709	-4.63534	14.8307
						Kick0049	-531.524
						Kick0028	-531.527
						Kick0077	-531.527																q(M5)	q(CO2)		E(M5)	E(CO2)	E_int
						Kick0034	-531.529								q(M)					q(C)	q(O)	q(O)
						Kick0008	-531.531							M5	0.044384	-0.066544	0.044418	0.044308	-0.066546	0.327958	-0.163971	-0.163971
						Kick0082	-531.541							g1	-0.077031	0.022446	0.02238	-0.108744	0.022444	0.358929	-0.126146	-0.114286	-0.118505	0.118497		-342.474	-188.923	-0.438723		0.00225856	0.00160276
														ts1	0.028325	0.165494	0.119735	0.11599	0.064569	0.061542	-0.374182	-0.181484	0.494113	-0.494124		-342.459	-188.715	3.81188		0.39348	5.66045
														g2	0.052902	0.216405	0.160704	0.2184	0.146649	-0.122658	-0.409697	-0.262707	0.79506	-0.795062		-342.438	-188.617	4.09709		0.965849	8.31956
														ts2	0.012518	0.161629	0.137408	0.291872	0.234066	-0.175831	-0.409673	-0.25188	0.837493	-0.837384		-342.426	-188.591	5.62081		1.30782	9.02029
														g3	0.029609	0.194193	0.166704	0.278504	0.17569	-0.186631	-0.408376	-0.249658	0.8447	-0.844665		-342.439	-188.579	5.83979		0.957195	9.34375
														ts3	0.078688	0.312825	0.127121	0.364847	0.230242	-0.334876	-0.380071	-0.398875	1.11372	-1.11382		-342.394	-188.13	15.3419		2.187	21.5702
														g4	0.03612	0.174057	0.145042	0.31978	0.19418	-0.196743	-0.389245	-0.283366	0.869179	-0.869354		-342.388	-188.569	4.52323		2.32697	9.61758
														ts4	0.078688	0.312825	0.127121	0.364847	0.230242	-0.334876	-0.380071	-0.398875	1.11372	-1.11382		-342.394	-188.13	15.3419		2.187	21.5702
														g5	0.162389	0.328858	0.109352	0.297417	0.28532	-0.371012	-0.407486	-0.404834	1.18334	-1.18333		-342.413	-188.124	15.1758		1.65819	21.739
														ts4b	0.030974	0.282353	0.125522	0.294027	0.212511	-0.244809	-0.40778	-0.292752	0.945387	-0.945341		-342.407	-188.48	8.0281		1.80944	12.0315
														g5b	0.032913	0.258445	0.207639	0.407055	0.250986	-0.364458	-0.389533	-0.403098	1.15704	-1.15709		-342.396	-188.129	14.8307		2.12729	21.5933

## Sheet: Ru5
B3P86/sdd
a.u. to eV	27.2116												Physisorbed	top	a0011
CO2	-188.923													base	a0047																		-188.695
Zero	-665.197
Ru5		assoc_CO2		chair_CO2		dissoc_CO2		chair_CO2_TS
Kick0019	-476.103	Kick0010	-665.138	Kick0074	-665.197	Kick0056	-665.192	Kick0020	-664.954
Kick0062	-476.111	Kick0044	-665.177	Kick0007	-665.21	Kick0094	-665.197	Kick0085	-665.046
Kick0044	-476.118	Kick0038	-665.202	Kick0053	-665.214	Kick0032	-665.208	Kick0010	-665.065
Kick0035	-476.156	Kick0011	-665.21	Kick0093	-665.214	Kick0026	-665.209	Kick0059	-665.075
Kick0011	-476.157	Kick0054	-665.214	Kick0077	-665.214	Kick0075	-665.213	Kick0031	-665.082
Kick0097	-476.164	Kick0097	-665.214	Kick0019	-665.219	Kick0038	-665.213	Kick0073	-665.164
Kick0025	-476.189	Kick0047	-665.214	Kick0031	-665.228	Kick0087	-665.213	Kick0011	-665.167
Kick0096	-476.191	Kick0049	-665.228	Kick0052	-665.239	Kick0001	-665.226	Kick0050	-665.176
Kick0086	-476.197	Kick0099	-665.242	Kick0071	-665.243	Kick0042	-665.228	Kick0084	-665.188
Kick0064	-476.2	Kick0002	-665.243	Kick0080	-665.25	Kick0057	-665.243	Kick0015	-665.189
Kick0040	-476.224	Kick0015	-665.244	Kick0037	-665.267	Kick0072	-665.245	Kick0067	-665.195
Kick0073	-476.274	Kick0037	-665.25	Kick0027	-665.27	Kick0071	-665.246	Kick0002	-665.199
Kick0030	-476.274	Kick0034	-665.255	Kick0082	-665.278	Kick0012	-665.246	Kick0068	-665.209
Kick0059	-476.274	Kick0035	-665.267	Kick0050	-665.281	Kick0092	-665.248	Kick0062	-665.212
Kick0041	-476.274	Kick0081	-665.267	Kick0028	-665.285	Kick0004	-665.25	Kick0003	-665.215
Kick0079	-476.274	Kick0076	-665.274			Kick0064	-665.253	Kick0091	-665.218
Kick0018	-476.274	Kick0021	-665.276			Kick0008	-665.253	Kick0092	-665.22
Kick0016	-476.274					Kick0050	-665.263	Kick0071	-665.222					qst2_g90_a0099	ts99
Kick0099	-476.274					Kick0003	-665.267	Kick0082	-665.239					B3P86/sdd																					TPSSTPSS/Def2TZVP
Kick0033	-476.274					Kick0095	-665.268	Kick0098	-665.242
Kick0048	-476.274					Kick0030	-665.268								0,1	0,3	0,5	0,7	0,9	0,11	0,13	0,15		0,1	0,3	0,5	0,7	0,9	0,11	0,13	0,15
						Kick0039	-665.268							Ru5	-476.274	-476.27	-476.265	-476.257	-476.279	-476.283	-476.298	-476.258													-474.483	-474.479	-474.469	-474.464	-474.46	-474.459	-474.453	-474.441
	-1.36929					Kick0070	-665.273							Ru5 + CO2	-665.197	-665.193	-665.188	-665.18	-665.202	-665.205	-665.221	-665.181		0	0.103967	0.253264	0.464701	-0.133533	-0.228613	-0.649544	0.433522				-663.178	-663.174	-663.164	-663.159	-663.154	-663.153	-663.147	-663.135		0	0.11886	0.39318	0.522626	0.645323	0.679038
						Kick0066	-665.274							g1	-665.21	-665.212	-665.199	-665.218	-665.22	-665.221	-665.235	-665.236	g1	-0.361392	-0.411427	-0.0500908	-0.564971	-0.642035	-0.655919	-1.02706	-1.07476				-663.243	-663.239	-663.231	-663.222	-663.209	-663.166	-663.16	-663.179		-1.75691	-1.65258	-1.43263	-1.18566	-0.853511	0.332017
						Kick0007	-665.274							ts1	-665.245	-665.255	-665.251	-665.255	-665.262	-665.249	-665.27	-665.246	ts1	-1.32027	-1.57781	-1.47555	-1.57815	-1.77957	-1.42399	-1.98254	-1.33957		-0.958876		-663.225	-663.218	-663.213	-663.206	-663.208	-663.194	-663.159	-663.169		-1.28299	-1.08606	-0.942357	-0.761291	-0.807115	-0.428112
						Kick0084	-665.274							g2	-665.228	-665.227	-665.24	-665.261	-665.25	-665.279	-665.27	-665.258	g2	-0.845845	-0.807212	-1.16091	-1.7477	-1.45522	-2.23045	-1.99467	-1.66969				-663.205	-663.239	-663.223	-663.219	-663.193	-663.209	-663.193	-663.157		-0.741671	-1.65258	-1.23034	-1.1274	-0.406969	-0.853729
						Kick0006	-665.276							ts2	-665.22	-665.219	-665.238	-665.242	-665.246	-665.258	-665.235	-665.239	ts2	-0.63518	-0.604081	-1.10761	-1.22359	-1.32823	-1.6604	-1.03269	-1.1351		0.210666		-663.199	-663.209	-663.199	-663.197	-663.187	-663.192	-663.171	-663.176		-0.572986	-0.835932	-0.561286	-0.529448	-0.234284	-0.369634
						Kick0020	-665.276							g3	-665.267	-665.275	-665.261	-665.27	-665.276	-665.279	-665.277	-665.269	g3	-1.92142	-2.13581	-1.75778	-2.00135	-2.16066	-2.23061	-2.17993	-1.97243				-663.243	-663.239	-663.231	-663.219	-663.217	-663.209	-663.195	-663.179		-1.75688	-1.65258	-1.43263	-1.12182	-1.06644	-0.853729
						Kick0076	-665.277							ts3	-665.272	-665.286	-665.291	-665.297	-665.291	-665.28	-665.266	-665.259	ts3	-2.03299	-2.43497	-2.55867	-2.73283	-2.56073	-2.25679	-1.87261	-1.69396		-0.111566		-663.258	-663.261	-663.254	-663.246	-663.228	-663.215	-663.19	-663.177		-2.1797	-2.25055	-2.07482	-1.85405	-1.37336	-1.00829
						Kick0023	-665.278							g4	-665.285	-665.3	-665.301	-665.296	-665.3	-665.291	-665.282	-665.255	g4	-2.41065	-2.7989	-2.83353	-2.6885	-2.80086	-2.55864	-2.30487	-1.59442				-663.272	-663.269	-663.262	-663.245	-663.241	-663.22	-663.209	-663.171		-2.5692	-2.48553	-2.29864	-1.82213	-1.70265	-1.1539
						Kick0041	-665.278							ts4	-665.278	-665.29	-665.295	-665.29	-665.287	-665.269	-665.264	-665.268	ts4	-2.19631	-2.52835	-2.65713	-2.5274	-2.46103	-1.95688	-1.8227	-1.92535		0.214341		-663.262	-663.262	-663.253	-663.241	-663.227	-663.215	-663.19	-663.158		-2.29877	-2.28492	-2.0287	-1.70855	-1.3265	-0.998168
						Kick0067	-665.281							g5	-665.294	-665.298	-665.299	-665.295	-665.289	-665.282	-665.264	-665.268	g5	-2.63966	-2.7527	-2.78363	-2.66077	-2.51705	-2.31503	-1.83214	-1.93116				-663.268	-663.264	-663.256	-663.24	-663.227	-663.222	-663.205	-663.183		-2.45012	-2.32775	-2.12538	-1.68594	-1.33415	-1.20606
						Kick0097	-665.281							ts5	-665.276	-665.296	-665.294	-665.296	-665.3	-665.298	-665.297	-665.273	ts5	-2.14469	-2.69353	-2.6316	-2.70512	-2.80412	-2.75324	-2.72	-2.07628		0.494965		-663.25	-663.253	-663.244	-663.232	-663.222	-663.229	-663.215	-663.191		-1.94872	-2.04383	-1.79242	-1.47255	-1.1868	-1.38327
						Kick0098	-665.282							g6	-665.294	-665.294	-665.293	-665.295	-665.293	-665.287	-665.28	-665.256	g6	-2.63965	-2.63297	-2.60492	-2.66576	-2.61829	-2.45685	-2.25778	-1.59604				-663.268	-663.262	-663.253	-663.242	-663.239	-663.229	-663.203	-663.172		-2.44904	-2.28002	-2.04304	-1.75435	-1.6528	-1.39075
						Kick0024	-665.282							ts6	-665.187	-665.197	-665.23	-665.214	-665.206	-665.202	-665.196	-665.16	ts6	0.26692	0.0046346	-0.88948	-0.475513	-0.257702	-0.128276	0.0122794	1.00513		2.90657		-663.159	-663.163	-663.171	-663.166	-663.149	-663.121	-663.189	-663.073		0.509872	0.41289	0.191088	0.318792	0.798641	1.56097
						Kick0018	-665.282							g7	-665.225	-665.287	-665.284	-665.261	-665.277	-665.269	-665.254	-665.233	g7	-0.757339	-2.45067	-2.38299	-1.73873	-2.19042	-1.96837	-1.55554	-0.993975				-663.206	-663.252	-663.215	-663.213	-663.225	-663.206	-663.178	-663.146		-0.75095	-2.00998	-0.998576	-0.9432	-1.273	-0.760774
						Kick0078	-665.285							ts7	-665.255	-665.27	-665.263	-665.263	-665.273	-665.26	-665.232	-665.213	ts7	-1.56917	-1.99448	-1.80458	-1.8072	-2.07193	-1.73014	-0.956162	-0.448068		-0.811835		-663.222	-663.224	-663.24	-663.225	-663.215	-663.194	-663.158	-663.138		-1.19858	-1.25488	-1.68025	-1.28101	-0.995419	-0.444684
						Kick0002	-665.285							g8	-665.277	-665.287	-665.283	-665.279	-665.279	-665.273	-665.248	-665.246	g8	-2.17399	-2.46338	-2.33493	-2.23826	-2.2439	-2.0793	-1.40221	-1.32651				-663.254	-663.252	-663.244	-663.233	-663.225	-663.203	-663.173	-663.156		-2.07229	-2.00998	-1.79563	-1.507	-1.27461	-0.678595
						Kick0021	-665.289							g1b	-665.214	-665.211	-665.204	-665.216	-665.221	-665.227	-665.232	-665.236	g1b	-0.461746	-0.370967	-0.193993	-0.522575	-0.666513	-0.826737	-0.950861	-1.07476		1.71225		-663.224	-663.214	-663.214	-663.218	-663.205	-663.191	-663.179			-1.25477	-0.981596	-0.990412	-1.0869	-0.731576	-0.360246
						Kick0088	-665.29							ts1b	-665.22	-665.239	-665.271	-665.239	-665.246	-665.256	-665.261	-665.245	ts1b	-0.638213	-1.15851	-2.02378	-1.15901	-1.33504	-1.61062	-1.75463	-1.29975				-663.198	-663.205	-663.2	-663.209	-663.205	-663.186	-663.181	-663.15		-0.531298	-0.726405	-0.602702	-0.834354	-0.74627	-0.215072
						Kick0005	-665.294							ts99	-665.259	-665.29	-665.285	-665.29	-665.286	-665.284	-665.276	-665.258	ts99	-1.68673	-2.52391	-2.40937	-2.54343	-2.43248	-2.37581	-2.14222	-1.6517		-1.04851		-663.234	-663.246	-663.246	-663.235	-663.234	-663.228	-663.215	-663.168		-1.51916	-1.84497	-1.858	-1.54526	-1.52071	-1.36947
															r(CO)	r(CO)	theta(OCO)	v_bend	v_bend	v_symm_stretch	v_asym_stretch	v_imag	E(HOMO)	E(LUMO)	q(M5)	q(CO2)	E_ads	E_int
														M5									-0.17617	-0.10727
														g1	1.266	1.292	178.72	547.639	738.25	1145.27	1623.58		-0.20783	-0.10351	0.381469	-0.38136	-0.361392	-0.370374
														ts1	1.236	1.309	138.05	510.361	690.142	1063.95	1730.61	-35.4775	-0.20566	-0.14974	0.374114	-0.374158	-1.32027	0.36108
														g2	1.226	1.284	144.55	534.692	669.967	1105.37	1835.13		-0.20738	-0.13833	0.321811	-0.32184	-0.845845	0.271378
														ts2	1.225	1.292	143.48	475.786	655.153	1062.31	1819.67	-76.3738	-0.2056	-0.15005	0.345204	-0.345304	-0.63518	0.551624
														g3	1.266	1.291	137.07	547.518	738.295	1146.01	1623.39		-0.20784	-0.13915	0.381378	-0.381269	-1.92142	-0.346635
														ts3	1.181	4.357	103.84	444.759	475.357	921.673	1935.14	-163.481	-0.22609	-0.16693	0.39492	-0.39493	-2.03299	5.89277
														g4	1.189	5.334	132.82	459.018	517.103	921.745	1906.01		-0.22545	-0.1685	0.456165	-0.456185	-2.41065	5.46857
														ts4	1.187	5.975	153.95	456.141	500.811	919.981	1906.44	-133.781	-0.22619	-0.17042	0.437014	-0.437035	-2.19631	5.56313
														g5	1.217	5.986	158.22	440.829	499.941	926.185	1747.75		-0.22501	-0.16152	0.549775	-0.54975	-2.63966	5.34128
														ts5	1.19	4.223	169.82	466.587	525.988	811.142	1904.88	-131.257	-0.22114	-0.15059	0.490426	-0.49055	-2.14469	5.87097
														g6	1.217	5.985	179.6	441.19	500.09	926.278	1746.49		-0.22498	-0.1577	0.550038	-0.550012	-2.63965	5.18765
														ts6	1.848	5.895	59.01	420.905	622.041	751.574	936.078	-389.525	-0.23073	-0.16672	0.707339	-0.707446	0.26692	14.6532
														g7	3.106	5.927	51.07	419.416	734.351	825.291	937.858		-0.23441	-0.17585	0.795338	-0.795352	-0.757339	19.8785
														ts7	3.534	4.825	64.99	598.905	682.553	714.773	944.76	-165.104	-0.22265	-0.1677	0.860928	-0.860889	-1.56917	18.911
														g8	3.196	4.607	67.67	641.182	658.386	762.397	937.889		-0.22157	-0.16408	0.838427	-0.838442	-2.17399	17.5035
														g1b	1.188	1.191	179.73	461.57	584.67	1254.24	2325.93		-0.17041	-0.10319	-0.098315	0.098269	-0.461746	-0.466483
														ts1b	1.255	1.337	130.62	529.601	725.654	1058.91	1574.33	-89.225	-0.20001	-0.14662	0.433937	-0.433886	-0.638213	1.40295
														ts99	1.193	3.05	144.07	498.914	558.488	653.502	1898.91	-333.207	-0.20148	-0.15754	0.443815	-0.44384	-1.68673	5.6828
																							q(M5)	q(CO2)		E(M5)	E(CO2)	E_int
															q(M)					q(C)	q(O)	q(O)
														M5	0.016651	-0.004214	-0.004128	-0.004205	-0.004211	0.327958	-0.163971	-0.163971
														g1	0.13424	0.064204	0.009682	0.064177	0.109166	0.118714	-0.249066	-0.251008	0.381469	-0.38136		-476.274	-188.923	-0.370374
														ts1	0.113701	0.104021	0.104112	0.026202	0.026078	0.124582	-0.233312	-0.265428	0.374114	-0.374158		-476.274	-188.86	0.36108
														g2	0.079874	0.081541	0.039416	0.039431	0.081549	0.137856	-0.215189	-0.244507	0.321811	-0.32184		-476.274	-188.881	0.271378
														ts2	0.092604	0.073924	0.013561	0.069124	0.095991	0.130431	-0.22756	-0.248175	0.345204	-0.345304		-476.273	-188.878	0.551624
														g3	0.134191	0.064104	0.0098	0.064147	0.109136	0.118768	-0.248903	-0.251134	0.381378	-0.381269		-476.271	-188.861	-0.346635
														ts3	0.031289	0.070462	0.154471	0.097126	0.041572	0.056447	-0.131711	-0.319666	0.39492	-0.39493		-476.269	-188.626	5.89277
														g4	0.066341	0.035882	0.145238	0.120992	0.087712	0.031736	-0.16588	-0.322041	0.456165	-0.456185		-476.267	-188.626	5.46857
														ts4	0.05224	0.055487	0.124601	0.110148	0.094538	0.03781	-0.15658	-0.318265	0.437014	-0.437035		-476.263	-188.626	5.56313
														g5	0.123866	0.097608	0.099396	0.097609	0.131296	-0.01548	-0.214617	-0.319653	0.549775	-0.54975		-476.271	-188.626	5.34128
														ts5	0.124987	0.082393	0.11733	0.0824	0.083316	0.031606	-0.171709	-0.350447	0.490426	-0.49055		-476.272	-188.626	5.87097
														g6	0.12391	0.097665	0.09946	0.097605	0.131398	-0.015598	-0.214786	-0.319628	0.550038	-0.550012		-476.261	-188.622	5.18765
														ts6	0.189273	0.087901	0.093146	0.17866	0.158359	-0.147009	-0.248754	-0.311683	0.707339	-0.707446		-476.255	-188.375	14.6532
														g7	0.217894	0.073612	0.122853	0.232512	0.148467	-0.18836	-0.301079	-0.305913	0.795338	-0.795352		-476.241	-188.131	19.8785
														ts7	0.261008	0.144197	0.095287	0.18251	0.177926	-0.2308	-0.329097	-0.300992	0.860928	-0.860889		-476.227	-188.122	18.911
														g8	0.266907	0.110203	0.121671	0.210891	0.128755	-0.226207	-0.30246	-0.309775	0.838427	-0.838442		-476.207	-188.132	17.5035
														g1b	0.007677	-0.024577	-0.014671	-0.021932	-0.044812	0.34749	-0.110469	-0.138752	-0.098315	0.098269		-476.274	-188.923	-0.466483
														ts1b	0.126939	0.025647	0.041023	0.133554	0.106774	0.089069	-0.264197	-0.258758	0.433937	-0.433886		-476.266	-188.839	1.40295
														ts99	0.138368	0.00647	0.158858	0.103292	0.036827	0.022912	-0.187308	-0.279444	0.443815	-0.44384		-476.254	-188.631	5.6828
[truncated: 2 more columns]

## Sheet: Rh5 sq pyr
B3P86/sdd
a.u. to eV	27.2116
CO2	-188.923																												-188.695
Zero	-743.688
Rh5		assoc_CO2		chair_CO2		dissoc_CO2		chair_CO2_TS
Kick0002	-554.654	Kick0012	-743.694	Kick0020	-743.662	Kick0034	-743.662	Kick0014	-743.524
Kick0045	-554.707	Kick0016	-743.694	Kick0073	-743.667	Kick0029	-743.662	Kick0032	-743.636
Kick0047	-554.717	Kick0000	-743.698	Kick0000	-743.671	Kick0044	-743.662	Kick0036	-743.636
Kick0011	-554.743	Kick0050	-743.699	Kick0058	-743.702	Kick0001	-743.663	Kick0038	-743.649
Kick0065	-554.757	Kick0007	-743.699	Kick0068	-743.702	Kick0046	-743.67	Kick0002	-743.655
Kick0021	-554.759	Kick0070	-743.699	Kick0057	-743.706	Kick0037	-743.671	Kick0024	-743.666
Kick0051	-554.759	Kick0035	-743.701	Kick0001	-743.721	Kick0030	-743.671	Kick0026	-743.697
Kick0039	-554.759	Kick0026	-743.701	Kick0011	-743.726	Kick0032	-743.672	Kick0013	-743.712
Kick0035	-554.76	Kick0059	-743.702	Kick0005	-743.727	Kick0079	-743.672
Kick0029	-554.76	Kick0031	-743.702	Kick0060	-743.728	Kick0045	-743.673
Kick0036	-554.76	Kick0042	-743.702	Kick0013	-743.729	Kick0071	-743.685
Kick0026	-554.76	Kick0043	-743.703	Kick0034	-743.73	Kick0025	-743.7
Kick0062	-554.76	Kick0072	-743.722	Kick0067	-743.731	Kick0085	-743.702
Kick0014	-554.761	Kick0008	-743.724	Kick0047	-743.731	Kick0027	-743.702							B3P86/sdd																	TPSSTPSS/Def2TZVP
Kick0031	-554.761	Kick0006	-743.727	Kick0050	-743.732	Kick0033	-743.707
Kick0043	-554.764	Kick0003	-743.727	Kick0069	-743.732	Kick0023	-743.724								0,2	0,4	0,6	0,8	0,10	0,12
Kick0004	-554.764	Kick0001	-743.728	Kick0028	-743.733	Kick0051	-743.725							Rh5	-554.765	-554.774	-554.779	-554.779	-554.774	-554.752											-552.759	-552.766	-552.769	-552.765	-552.752	-552.732
Kick0025	-554.764	Kick0065	-743.729	Kick0041	-743.733	Kick0017	-743.726							Rh5 + CO2	-743.688	-743.696	-743.702	-743.702	-743.696	-743.674		0	-0.227489	-0.382889	-0.370576	-0.227122	0.370323				-741.454	-741.46	-741.463	-741.46	-741.447	-741.427		0	-0.181012	-0.260361	-0.164168	0.180331	0.731312
Kick0072	-554.765	Kick0029	-743.73	Kick0039	-743.735	Kick0008	-743.726							g1	-743.698	-743.709	-743.715	-743.721	-743.709	-743.682	g1	-0.282245	-0.573478	-0.729409	-0.899532	-0.571146	0.152647				-741.502	-741.506	-741.507	-741.5	-741.468	-741.434		-1.32212	-1.43951	-1.45195	-1.26563	-0.39739	0.541383
Kick0067	-554.765	Kick0014	-743.732	Kick0066	-743.737	Kick0006	-743.727							g1ax	-743.695	-743.705	-743.714	-743.712	-743.709	-743.689	g1ax	-0.183461	-0.453473	-0.695134	-0.667177	-0.563862	-0.0158562				-741.5	-741.506	-741.507	-741.507	-741.482	-741.439		-1.26356	-1.43951	-1.45195	-1.44324	-0.779495	0.388508
Kick0054	-554.765	Kick0056	-743.735	Kick0063	-743.738	Kick0005	-743.729							ts1ax	-743.698	-743.706	-743.713	-743.712	-743.708	-743.688	ts1ax	-0.277911	-0.495862	-0.671662	-0.652701	-0.551985	0.00607091		-0.0944504		-741.484	-741.473	-741.495	-741.466	-741.47	-741.439		-0.834572	-0.529965	-1.11423	-0.34362	-0.458671	0.390331
Kick0042	-554.765	Kick0064	-743.736	Kick0059	-743.74	Kick0059	-743.729							ts1eq	-743.69	-743.707	-743.714	-743.721	-743.708	-743.678	ts1eq	-0.0478021	-0.516657	-0.702827	-0.890412	-0.555203	0.270502		0.135658		-741.46	-741.468	-741.471	-741.468	-741.458	-741.428		-0.165248	-0.386043	-0.473991	-0.386342	-0.107668	0.688516
Kick0046	-554.765	Kick0076	-743.74	Kick0027	-743.741	Kick0019	-743.729							g2	-743.747	-743.751	-743.752	-743.764	-743.732	-743.698	g2	-1.61299	-1.71438	-1.74426	-2.06847	-1.19826	-0.276289				-741.499	-741.506	-741.507	-741.507	-741.48	-741.445		-1.23932	-1.43949	-1.45195	-1.44327	-0.705915	0.23811
Kick0049	-554.765	Kick0009	-743.741	Kick0002	-743.741	Kick0083	-743.73							ts2a	-743.727	-743.694	-743.7	-743.703	-743.697	-743.677	ts2a	-1.05816	-0.151245	-0.315097	-0.420232	-0.233306	0.292848		0.554832		-741.445	-741.445	-741.447	-741.45	-741.434	-741.412		0.24328	0.235661	0.187006	0.110079	0.54092	1.14167
		Kick0002	-743.742	Kick0017	-743.743	Kick0039	-743.73							ts2b	-743.698	-743.703	-743.708	-743.715	-743.7	-743.677	ts2b	-0.261549	-0.422593	-0.553821	-0.722323	-0.332493	0.292848		1.35144		-741.489	-741.49	-741.493	-741.487	-741.47	-741.435		-0.96984	-0.987229	-1.06938	-0.912097	-0.45448	0.516675
	-0.123813	Kick0004	-743.742	Kick0056	-743.744	Kick0026	-743.731							g3a	-743.727	-743.733	-743.737	-743.738	-743.729	-743.718	g3a	-1.0681	-1.22615	-1.32467	-1.37268	-1.10874	-0.806602				-741.374	-741.387	-741.387	-741.381	-741.337	-741.349		2.15375	1.80014	1.81274	1.97636	3.17304	2.85388
		Kick0030	-743.743	Kick0010	-743.744	Kick0015	-743.732							g3b	-743.731	-743.735	-743.734	-743.736	-743.738	-743.705	g3b	-1.17062	-1.2829	-1.24333	-1.29438	-1.36619	-0.464679				-741.457	-741.46	-741.464	-741.463	-741.438	-741.407		-0.0864975	-0.18182	-0.292435	-0.254366	0.425053	1.262
		Kick0038	-743.743	Kick0030	-743.746	Kick0072	-743.732							ts3b	-743.732	-743.738	-743.733	-743.741	-743.729	-743.693	ts3b	-1.19723	-1.36738	-1.21501	-1.43094	-1.11179	-0.124485		-0.0266065		-741.498	-741.496	-741.499	-741.488	-741.477	-741.442		-1.20511	-1.16593	-1.22492	-0.925867	-0.648471	0.30954
		Kick0018	-743.744	Kick0036	-743.747	Kick0021	-743.732							ts3a	-743.617	-743.609	-743.622	-743.616	-743.651	-743.615	ts3a	1.92334	2.15285	1.80223	1.96169	1.00372	1.99398		3.09396		-741.495	-741.498	-741.497	-741.488	-741.47	-741.429		-1.13444	-1.20321	-1.19074	-0.931173	-0.439432	0.671454
		Kick0013	-743.747	Kick0052	-743.747	Kick0050	-743.732							g4b	-743.747	-743.744	-743.747	-743.741	-743.719	-743.697	g4b	-1.59837	-1.53238	-1.60066	-1.43775	-0.856242	-0.237356				-741.505	-741.503	-741.5	-741.498	-741.459	-741.436		-1.39548	-1.33815	-1.26081	-1.20332	-0.155397	0.472293
		Kick0017	-743.747	Kick0074	-743.747	Kick0069	-743.733							ts4b	-743.644	-743.643	-743.645	-743.637	-743.63	-743.588	ts4b	1.19464	1.21848	1.17576	1.37687	1.58178	2.72071		2.79301		-741.406	-741.405	-741.405	-741.384	-741.351	-741.324		1.2829	1.31093	1.32881	1.89551	2.77918	3.51871
		Kick0057	-743.747	Kick0046	-743.756	Kick0042	-743.733							g5b	-743.691	-743.686	-743.688	-743.671	-743.66	-743.635	g5b	-0.0828304	0.06007	0.00910108	0.449745	0.76765	1.45378				-741.445	-741.441	-741.444	-741.434	-741.421	-741.362		0.245321	0.334221	0.270192	0.520675	0.875269	2.48307
		Kick0015	-743.747			Kick0077	-743.734
						Kick0013	-743.734
						Kick0024	-743.735								r(CO)	r(CO)	theta(OCO)	v_bend	v_bend	v_symm_stretch	v_asym_stretch	v_imag	E(HOMO)	E(LUMO)	q(M5)	q(CO2)	E_ads	E_int
						Kick0065	-743.737							M5
						Kick0000	-743.737							g1	1.188	1.19	179.47	546.118	571.365	1268.24	2325.22		-0.18263	-0.12757	-0.093572	0.093581	-0.282245	-0.452048
						Kick0080	-743.739							g1ax	1.256	1.293	179.9	562.62	743.463	1132.06	1636.67		-0.22544	-0.11995	0.335899	-0.336049	-0.183461	-0.435524
						Kick0007	-743.739							ts1ax	1.186	1.197	179.18	514.107	574.934	1256.75	2295.4	-31.5252	-0.1895	-0.12333	-0.074889	0.074699	-0.277911	-0.476586
						Kick0002	-743.739							ts1eq	1.185	1.201	176.89	496.456	568.861	1243.58	2283.94	-63.4888	-0.1848	-0.12162	-0.076271	0.076199	-0.0478021	-0.0859011
						Kick0043	-743.74							g2	1.256	1.293	135.91	562.635	743.552	1132.38	1636.51		-0.22545	-0.1549	0.335917	-0.336068	-1.61299	-0.0835941
						Kick0004	-743.743							ts2a	1.183	4.591	107.71	446.635	523.612	902.571	1949.75	-32.7873	-0.23213	-0.17017	0.310326	-0.310394	-1.05816	5.70909
						Kick0036	-743.743							ts2b	1.183	5.015	116.12	444.497	517.051	863.175	1946.43	-364.511	-0.23255	-0.16683	0.320531	-0.320541	-0.261549	7.54102
						Kick0056	-743.744							g3a	3.733	5.097	48.66	527.263	672.088	832.342	1041.29		-0.24023	-0.1549	0.544464	-0.544475	-1.0681	16.8603
						Kick0081	-743.744							g3b	1.186	2.052	108.99	444.793	467.542	782.874	1893.96		-0.22616	-0.16425	0.311573	-0.311755	-1.17062	5.57192
						Kick0084	-743.745							ts3b	1.181	4.288	101.27	455.031	526.341	881.185	1960.17	-207.024	-0.24034	-0.16122	0.304761	-0.304763	-1.19723	6.51097
						Kick0076	-743.746							ts3a	1.184	6.414	125.93	458.665	523.039	868.925	1940.24	-214.294	-0.23618	-0.16978	0.330626	-0.330639	1.92334	9.74014
						Kick0074	-743.747							g4b	1.225	4.288	129.9	450.123	665.896	862.6	1679.53		-0.23512	-0.16392	0.428176	-0.428227	-1.59837	6.26042
						Kick0075	-743.747							ts4b	1.949	4.231	116.39	572.345	606.712	746.932	869.363	-362.748	-0.23457	-0.17434	0.545336	-0.545216	1.19464	16.3433
						Kick0073	-743.747							g5b	2.817	3.344	144.32	594.969	638.935	851.534	904.846		-0.22958	-0.16325	0.657375	-0.657275	-0.0828304	18.8385
						Kick0035	-743.753
						Kick0066	-743.758
						Kick0082	-743.763																q(M5)	q(CO2)		E(M5)	E(CO2)	E_int
															q(M)					q(C)	q(O)	q(O)
														M5	-0.01034	-0.003481	-0.003478	-0.01011	0.027376	0.327958	-0.163971	-0.163971
														g1	0.01345	-0.022306	-0.047285	-0.01738	-0.020051	0.344868	-0.108157	-0.14313	-0.093572	0.093581		-554.759	-188.923	-0.452048
														g1ax	0.130424	0.050389	0.073333	0.031316	0.050437	0.151166	-0.23306	-0.254155	0.335899	-0.336049		-554.756	-188.923	-0.435524
														ts1ax	-0.012454	-0.013564	-0.019345	-0.028425	-0.001101	0.335038	-0.120546	-0.139793	-0.074889	0.074699		-554.758	-188.922	-0.476586
														ts1eq	0.010749	-0.018554	-0.045739	-0.01869	-0.004037	0.334638	-0.125291	-0.133148	-0.076271	0.076199		-554.764	-188.922	-0.0859011
														g2	0.130438	0.050428	0.031292	0.073333	0.050426	0.151139	-0.254193	-0.233014	0.335917	-0.336068		-554.759	-188.86	-0.0835941
														ts2a	0.141312	0.068738	0.040626	0.072137	-0.012487	0.093157	-0.144765	-0.258786	0.310326	-0.310394		-554.759	-188.668	5.70909
														ts2b	0.14798	0.080499	0.030847	0.080211	-0.019006	0.087513	-0.146559	-0.261495	0.320531	-0.320541		-554.756	-188.626	7.54102
														g3a	0.20614	0.056968	0.109541	0.095655	0.07616	-0.036844	-0.242092	-0.265539	0.544464	-0.544475		-554.748	-188.246	16.8603
														g3b	0.054775	0.036065	0.065589	0.041179	0.113965	0.12485	-0.282118	-0.154487	0.311573	-0.311755		-554.763	-188.672	5.57192
														ts3b	0.011255	0.023944	0.09392	0.060341	0.115301	0.102099	-0.136827	-0.270035	0.304761	-0.304763		-554.753	-188.627	6.51097
														ts3a	-0.001421	0.101584	0.102086	0.008453	0.119924	0.082684	-0.154949	-0.258374	0.330626	-0.330639		-554.756	-188.626	9.74014
														g4b	0.10897	0.063344	0.110231	0.043732	0.101899	0.049367	-0.214484	-0.26311	0.428176	-0.428227		-554.752	-188.621	6.26042
														ts4b	0.159295	0.142856	0.098817	0.041195	0.103173	-0.053308	-0.232604	-0.259304	0.545336	-0.545216		-554.739	-188.34	16.3433
														g5b	0.247759	0.143922	0.0982	0.067528	0.099966	-0.074643	-0.262655	-0.319977	0.657375	-0.657275		-554.701	-188.163	18.8385

## Sheet: Rh5 tri bipy
B3P86/sdd
a.u. to eV	27.2116																p_eq	a0017	-743.698	-0.383795
CO2	-188.923																p_ax	a0013	-743.699	-0.413565									-188.695
Zero	-743.688
Ru5		assoc_CO2		chair_CO2		dissoc_CO2		chair_CO2_TS
Kick0002	-554.654	Kick0012	-743.694	Kick0020	-743.662	Kick0034	-743.662	Kick0014	-743.524
Kick0045	-554.707	Kick0016	-743.694	Kick0073	-743.667	Kick0029	-743.662	Kick0032	-743.636
Kick0047	-554.717	Kick0000	-743.698	Kick0000	-743.671	Kick0044	-743.662	Kick0036	-743.636
Kick0011	-554.743	Kick0050	-743.699	Kick0058	-743.702	Kick0001	-743.663	Kick0038	-743.649
Kick0065	-554.757	Kick0007	-743.699	Kick0068	-743.702	Kick0046	-743.67	Kick0002	-743.655
Kick0021	-554.759	Kick0070	-743.699	Kick0057	-743.706	Kick0037	-743.671	Kick0024	-743.666
Kick0051	-554.759	Kick0035	-743.701	Kick0001	-743.721	Kick0030	-743.671	Kick0026	-743.697
Kick0039	-554.759	Kick0026	-743.701	Kick0011	-743.726	Kick0032	-743.672	Kick0013	-743.712
Kick0035	-554.76	Kick0059	-743.702	Kick0005	-743.727	Kick0079	-743.672
Kick0029	-554.76	Kick0031	-743.702	Kick0060	-743.728	Kick0045	-743.673
Kick0036	-554.76	Kick0042	-743.702	Kick0013	-743.729	Kick0071	-743.685
Kick0026	-554.76	Kick0043	-743.703	Kick0034	-743.73	Kick0025	-743.7
Kick0062	-554.76	Kick0072	-743.722	Kick0067	-743.731	Kick0085	-743.702
Kick0014	-554.761	Kick0008	-743.724	Kick0047	-743.731	Kick0027	-743.702							B3P86/sdd																	TPSSTPSS/Def2TZVP
Kick0031	-554.761	Kick0006	-743.727	Kick0050	-743.732	Kick0033	-743.707
Kick0043	-554.764	Kick0003	-743.727	Kick0069	-743.732	Kick0023	-743.724								0,2	0,4	0,6	0,8	0,10	0,12
Kick0004	-554.764	Kick0001	-743.728	Kick0028	-743.733	Kick0051	-743.725							Rh5	-554.761	-554.767	-554.775	-554.787	-554.78	-554.752											-552.75	-552.757	-552.757	-552.761	-552.753	-552.725
Kick0025	-554.764	Kick0065	-743.729	Kick0041	-743.733	Kick0017	-743.726							Rh5 + CO2	-743.683	-743.69	-743.698	-743.71	-743.702	-743.674		0	-0.17075	-0.389855	-0.722658	-0.513442	0.246472				-741.444	-741.452	-741.451	-741.455	-741.447	-741.42		0	-0.207434	-0.182236	-0.30243	-0.0814171	0.667446
Kick0072	-554.765	Kick0029	-743.73	Kick0039	-743.735	Kick0008	-743.726							g1	-743.69	-743.704	-743.713	-743.723	-743.708	-743.68	g1	-0.188059	-0.564023	-0.809053	-1.06705	-0.674628	0.0847467				-741.499	-741.506	-741.502	-741.503	-741.477	-741.434		-1.48354	-1.67974	-1.56795	-1.60142	-0.899145	0.291063
Kick0067	-554.765	Kick0014	-743.732	Kick0066	-743.737	Kick0006	-743.727							ts1	-743.695	-743.704	-743.71	-743.722	-743.704	-743.668	ts1	-0.302987	-0.55953	-0.711978	-1.05632	-0.572761	0.425172		-0.114928		-741.455	-741.462	-741.461	-741.464	-741.453	-741.428		-0.292952	-0.468875	-0.444439	-0.527679	-0.226855	0.445408
Kick0054	-554.765	Kick0056	-743.735	Kick0063	-743.738	Kick0005	-743.729							g2	-743.74	-743.753	-743.756	-743.764	-743.742	-743.701	g2	-1.54939	-1.90068	-1.98434	-2.19579	-1.60001	-0.467398				-741.498	-741.506	-741.503	-741.503	-741.482	-741.437		-1.4714	-1.67974	-1.60855	-1.60145	-1.0241	0.197374
Kick0042	-554.765	Kick0064	-743.736	Kick0059	-743.74	Kick0059	-743.729							ts2	-743.692	-743.693	-743.702	-743.708	-743.695	-743.667	ts2	-0.220976	-0.269003	-0.50408	-0.664274	-0.324507	0.456625		1.32841		-741.449	-741.447	-741.444	-741.447	-741.428	-741.396		-0.134961	-0.0629595	0.00275654	-0.0700073	0.440891	1.31991
Kick0046	-554.765	Kick0076	-743.74	Kick0027	-743.741	Kick0019	-743.729	-1.1196						g3	-743.734	-743.732	-743.737	-743.741	-743.729	-743.69	g3	-1.3787	-1.312	-1.46753	-1.56074	-1.24651	-0.167195				-741.493	-741.487	-741.492	-741.485	-741.468	-741.426		-1.33352	-1.16231	-1.29703	-1.10745	-0.631764	0.494824
Kick0049	-554.765	Kick0009	-743.741	Kick0002	-743.741	Kick0083	-743.73							ts3	-743.711	-743.725	-743.731	-743.729	-743.728	-743.686	ts3	-0.750906	-1.12372	-1.30098	-1.24552	-1.21604	-0.0726709		0.627791		-741.482	-741.481	-741.481	-741.474	-741.466	-741.42		-1.03237	-0.998494	-1.00388	-0.807387	-0.584388	0.660243
		Kick0002	-743.742	Kick0017	-743.743	Kick0039	-743.73							g4	-743.736	-743.769	-743.737	-743.77	-743.77	-743.723	g4	-1.4386	-2.34036	-1.46054	-2.36355	-2.36587	-1.07707				-741.495	-741.492	-741.496	-741.487	-741.502	-741.458		-1.38542	-1.29899	-1.39622	-1.17227	-1.5563	-0.358994
		Kick0004	-743.742	Kick0056	-743.744	Kick0026	-743.731							ts4	-743.735	-743.738	-743.736	-743.738	-743.732	-743.707	ts4	-1.40757	-1.4778	-1.43877	-1.48956	-1.31274	-0.642478		0.0310333		-741.488	-741.492	-741.489	-741.492	-741.47	-741.441		-1.1813	-1.2905	-1.22171	-1.29959	-0.701371	0.0863778
		Kick0030	-743.743	Kick0010	-743.744	Kick0015	-743.732							g5	-743.756	-743.752	-743.771	-743.77	-743.77	-743.723	g5	-1.97564	-1.87684	-2.39434	-2.36352	-2.36586	-1.07709				-741.506	-741.51	-741.514	-741.51	-741.502	-741.447		-1.68706	-1.78287	-1.89084	-1.78186	-1.5563	-0.0774088
		Kick0038	-743.743	Kick0030	-743.746	Kick0072	-743.732							ts5	-743.738	-743.734	-743.748	-743.749	-743.757	-743.704	ts5	-1.48848	-1.3653	-1.75737	-1.78418	-1.99669	-0.56123		0.487162		-741.494	-741.492	-741.495	-741.493	-741.501	-741.447		-1.34822	-1.30375	-1.38041	-1.32215	-1.55214	-0.0695175
		Kick0018	-743.744	Kick0036	-743.747	Kick0021	-743.732							g6	-743.733	-743.743	-743.75	-743.75	-743.748	-743.702	g6	-1.34522	-1.62139	-1.81164	-1.80338	-1.76779	-0.519044				-741.502	-741.499	-741.5	-741.495	-741.48	-741.436		-1.57274	-1.47557	-1.50224	-1.3745	-0.964398	0.233974
		Kick0013	-743.747	Kick0052	-743.747	Kick0050	-743.732							ts6	-743.643	-743.648	-743.642	-743.645	-743.63	-743.603	ts6	1.09873	0.975687	1.12412	1.0411	1.44894	2.17808		2.44395		-741.423	-741.397	-741.393	-741.382	-741.364	-741.333		0.586064	1.28976	1.38472	1.69162	2.18292	3.02066
		Kick0017	-743.747	Kick0074	-743.747	Kick0069	-743.733	-1.22627						g7	-743.68	-743.686	-743.687	-743.688	-743.676	-743.647	g7	0.0941906	-0.0621783	-0.107127	-0.131545	0.188208	0.979379				-741.422	-741.427	-741.443	-741.42	-741.411	-741.37		0.596214	0.484647	0.0304852	0.67638	0.901692	2.03454
		Kick0057	-743.747	Kick0046	-743.756	Kick0042	-743.733
		Kick0015	-743.747			Kick0077	-743.734
						Kick0013	-743.734								r(CO)	r(CO)	theta(OCO)	v_bend	v_bend	v_symm_stretch	v_asym_stretch	v_imag	E(HOMO)	E(LUMO)	q(M5)	q(CO2)	E_ads	E_int
						Kick0024	-743.735							M5									-0.19457	-0.12282
						Kick0065	-743.737							g1	1.188	1.191	179.65	527.515	571.129	1266.33	2328.31		-0.18479	-0.11857	-0.106188	0.106217	-0.188059	-0.499009
						Kick0000	-743.737							ts1	1.186	1.193	179.9	567.418	577.841	1268.83	2321.14	-42.7174	-0.19145	-0.12607	-0.111261	0.111269	-0.302987	-0.46332
						Kick0080	-743.739							g2	1.257	1.284	136.7	547.246	739.78	1138.41	1661.58		-0.23356	-0.15136	0.313084	-0.313062	-1.54939	0.00553334
						Kick0007	-743.739							ts2	1.192	1.916	108.72	433.622	501.582	756.884	1862.72	-570.139	-0.23127	-0.1726	0.314319	-0.314338	-0.220976	6.44107
						Kick0002	-743.739							g3	1.181	4.164	108.55	434.214	523.314	862.82	1961.87		-0.23573	-0.16147	0.290159	-0.290197	-1.3787	6.48839
						Kick0043	-743.74							ts3	1.184	5.252	141.13	431.746	516.468	858.024	1938.14	-43.6664	-0.23357	-0.17278	0.306322	-0.306329	-0.750906	7.09077
						Kick0004	-743.743							g4	1.184	4.912	176.72	420.334	535.068	829.063	1949.54		-0.23842	-0.17289	0.343395	-0.343435	-1.4386	6.29113
						Kick0036	-743.743							ts4	1.184	4.811	175.99	422.179	535.21	812.217	1948.66	-40.2501	-0.23745	-0.16409	0.341359	-0.341369	-1.40757	6.32382
						Kick0056	-743.744							g5	1.184	3.817	178.87	534.135	538.375	654.277	1951.12		-0.22691	-0.15832	0.375863	-0.375896	-1.97564	5.74815
						Kick0081	-743.744							ts5	1.203	3.889	155.41	458.507	478.851	666.346	1797.17	-182.338	-0.23272	-0.17053	0.434358	-0.434417	-1.48848	6.43238
						Kick0084	-743.745							g6	1.206	3.206	130.61	481.452	519.072	592.938	1776.77		-0.23312	-0.16898	0.372872	-0.372904	-1.34522	6.46639
						Kick0076	-743.746							ts6	1.893	3.41	108.57	573.622	606.609	669.584	769.655	-385.937	-0.2279	-0.15977	0.567639	-0.56748	1.09873	15.9384
						Kick0074	-743.747							g7	2.848	3.132	87.98	541.539	548.898	574.419	940.003		-0.22501	-0.16135	0.570777	-0.570768	0.0941906	19.2749
						Kick0075	-743.747
					sqpy	Kick0073	-743.747	-1.61294
						Kick0035	-743.753																q(M5)	q(CO2)		E(M5)	E(CO2)	E_int
						Kick0066	-743.758								q(M)					q(C)	q(O)	q(O)
					tribipy	Kick0082	-743.763	-2.05214						M5	0.020171	-0.030016	-0.030012	0.020171	0.019668	0.327958	-0.163971	-0.163971
														g1	0.00607	-0.03855	0.000353	0.014096	-0.088157	0.348274	-0.139196	-0.102861	-0.106188	0.106217		-554.749	-188.923	-0.499009
														ts1	0.000317	-0.033606	-0.003455	-0.005601	-0.068916	0.35252	-0.132048	-0.109203	-0.111261	0.111269		-554.755	-188.923	-0.46332
														g2	0.107691	0.019937	0.070706	0.051216	0.063534	0.157235	-0.225341	-0.244956	0.313084	-0.313062		-554.758	-188.862	0.00553334
														ts2	0.110139	0.030306	0.089459	0.032662	0.051753	0.127717	-0.272675	-0.16938	0.314319	-0.314338		-554.756	-188.673	6.44107
														g3	0.117415	0.063756	0.015588	0.104742	-0.011342	0.096875	-0.138409	-0.248663	0.290159	-0.290197		-554.754	-188.626	6.48839
														ts3	0.101449	0.07585	0.028583	0.102292	-0.001852	0.091254	-0.145426	-0.252157	0.306322	-0.306329		-554.753	-188.626	7.09077
														g4	0.095303	0.041972	0.088085	0.095295	0.02274	0.079669	-0.156089	-0.267015	0.343395	-0.343435		-554.748	-188.626	6.29113
														ts4	0.11112	0.029012	0.09745	0.082838	0.020939	0.079878	-0.156234	-0.265013	0.341359	-0.341369		-554.748	-188.626	6.32382
														g5	0.077167	0.012684	0.135162	0.077284	0.073566	0.075571	-0.162095	-0.289372	0.375863	-0.375896		-554.749	-188.627	5.74815
														ts5	0.123784	-0.009925	0.137682	0.066205	0.116612	0.044946	-0.177631	-0.301732	0.434358	-0.434417		-554.754	-188.625	6.43238
														g6	0.069134	-0.035943	0.140667	0.041229	0.157785	0.05182	-0.179892	-0.244832	0.372872	-0.372904		-554.751	-188.626	6.46639
														ts6	0.147786	0.021795	0.097693	0.157852	0.142513	-0.063144	-0.216695	-0.287641	0.567639	-0.56748		-554.721	-188.337	15.9384
														g7	0.105756	0.092347	0.068788	0.144502	0.159384	-0.063283	-0.223789	-0.283696	0.570777	-0.570768		-554.71	-188.166	19.2749

## Sheet: Pd5
B3P86/sdd
a.u. to eV	27.2116
CO2	-188.923																								-188.695
Zero	-830.614
Pd5		assoc_CO2		chair_CO2		dissoc_CO2		chair_CO2_TS
Kick0089	-641.564	Kick0003	-830.584	Kick0083	-830.58	Kick0095	-830.452	Kick0058	-830.452
Kick0098	-641.622	Kick0057	-830.615	Kick0053	-830.613	Kick0092	-830.509	Kick0055	-830.469
Kick0041 (sqpl)	-641.691	Kick0033	-830.619	Kick0039	-830.619	Kick0063	-830.512	Kick0026	-830.47
Kick0050	-641.691	Kick0010	-830.621	Kick0046	-830.623	Kick0065	-830.518	Kick0033	-830.505
Kick0010	-641.691	Kick0097	-830.625	Kick0023	-830.627	Kick0037	-830.523	Kick0013	-830.53
Kick0000	-641.692	Kick0082	-830.625	Kick0035	-830.628	Kick0033	-830.524	Kick0070	-830.561
Kick0039	-641.692	Kick0039	-830.627	Kick0087	-830.628	Kick0008	-830.566	Kick0034	-830.575
Kick0081	-641.692	Kick0051	-830.627	Kick0099	-830.634	Kick0075	-830.567	Kick0072	-830.584
		Kick0026	-830.628	Kick0054	-830.636	Kick0057	-830.567	Kick0095	-830.627
	-0.0084356	Kick0067	-830.628	Kick0025	-830.64	Kick0017	-830.567	Kick0042	-830.637
		Kick0035	-830.628	Kick0006	-830.642	Kick0099	-830.569	Kick0090	-830.643
		Kick0024	-830.636	Kick0091	-830.648	Kick0020	-830.579
		Kick0053	-830.637	Kick0000	-830.648	Kick0013	-830.58							B3P86/sdd													TPSSTPSS/Def2TZVP
		Kick0086	-830.638	Kick0020	-830.648	Kick0012	-830.581
		Kick0046	-830.644	Kick0072	-830.663	Kick0046	-830.581
		Kick0018	-830.645			Kick0090	-830.585								0,1	0,3	0,5	0,7
		Kick0049	-830.648			Kick0087	-830.587							Pd5	-641.692	-641.715	-641.685	-641.645									-639.334	-639.463	-639.447	-639.395
		Kick0074	-830.648			Kick0042	-830.613							Pd5 + CO2	-830.614	-830.638	-830.608	-830.568		0	-0.646444	0.171839	1.26066				-828.029	-828.158	-828.142	-828.09		0	-3.50782	-3.08269	-1.66328
		Kick0099	-830.663			Kick0030	-830.613							g1a	-830.625	-830.649	-830.625	-830.567	g1a	-0.301098	-0.946095	-0.289089	1.27653		0.0556665		-828.147	-828.175	-828.153	-828.102		-3.21989	-3.99199	-3.38117	-1.99588
		Kick0085	-830.663			Kick0023	-830.614							ts1a	-830.623	-830.648	-830.62	-830.57	ts1a	-0.245432	-0.912955	-0.170586	1.20134				-828.161	-828.167	-828.144	-828.099		-3.59524	-3.76012	-3.1441	-1.91384
						Kick0079	-830.615							g2	-830.663	-830.68	-830.648	-830.576	g2	-1.34028	-1.79881	-0.921809	1.04604		2.41916		-828.181	-828.191	-828.168	-828.106		-4.15455	-4.41497	-3.77783	-2.10282
						Kick0019	-830.619							ts2a	-830.575	-830.599	-830.616	-830.564	ts2a	1.07888	0.405972	-0.0519328	1.37807				-828.105	-828.116	-828.099	-828.08		-2.07082	-2.37614	-1.92094	-1.38544
						Kick0048	-830.619							g3a	-830.58	-830.613	-830.616	-830.564	g3a	0.937624	0.0326971	-0.0520114	1.37807		-0.0513918		-828.115	-828.127	-828.13	-828.082		-2.34971	-2.68888	-2.751	-1.45388
						Kick0082	-830.619							ts3a	-830.582	-830.612	-830.607	-830.548	ts3a	0.886232	0.0544281	0.196791	1.80144				-828.117	-828.129	-828.123	-828.07		-2.39567	-2.72121	-2.5618	-1.12895
						Kick0035	-830.619							g4a	-830.596	-830.621	-830.602	-830.564	g4a	0.503804	-0.196554	0.331443	1.35886		3.94906		-828.123	-828.138	-828.124	-828.091		-2.57829	-2.96962	-2.58866	-1.70719
	3	5	7			Kick0086	-830.619							ts4a	-830.451	-830.466	-830.469	-830.481	ts4a	4.45286	4.03026	3.94341	3.61374				-827.983	-827.996	-827.981	-827.952		1.2558	0.899324	1.31093	2.08687
Kick0041	-641.711	-641.688	-641.645			Kick0032	-830.621							g5a	-830.541	-830.543	-830.524	-830.502	g5a	1.99291	1.94124	2.45052	3.05483		-2.36112		-828.065	-828.063	-828.04	-828.011		-0.984127	-0.93618	-0.304136	0.494116
						Kick0043	-830.623							g1b	-830.628	-830.65	-830.618	-830.577	g1b	-0.368207	-0.988498	-0.102198	1.02343				-828.017	-828.191	-828.153	-828.102		0.327854	-4.41499	-3.38117	-1.99588
						Kick0016	-830.623							ts1b	-830.625	-830.648	-830.619	-830.562	ts1b	-0.282095	-0.910377	-0.123617	1.41393		0.282095		-828.171	-828.168	-828.15	-828.096		-3.86216	-3.78597	-3.30971	-1.84048
						Kick0051	-830.627
						Kick0045	-830.628
						Kick0002	-830.637								r(CO)	r(CO)	theta(OCO)	v_bend	v_bend	v_symm_stretch	v_asym_stretch	v_imag	E(HOMO)	E(LUMO)	q(M5)	q(CO2)	E_ads	E_int
						Kick0084	-830.637							M5									-0.20411	-0.1642
						Kick0005	-830.638							g1a	1.185	1.192	179.56	583.276	586.511	1280.83	2325.81		-0.1949	-0.15578	-0.086467	0.086497	-0.301098	-0.346028
						Kick0039	-830.638							ts1a	1.188	1.196	176.68	502.55	576.446	1253.87	2288.39	-21.2747	-0.20632	-0.16325	-0.036575	0.036676	-0.245432	-0.278415
						Kick0078	-830.638							g2	1.244	1.28	137.77	551.34	752.101	1157.01	1709.4		-0.22953	-0.1761	0.286287	-0.286391	-1.34028	-0.0414223
						Kick0044	-830.638							ts2a	1.175	2.213	106.72	374.559	448.364	743.413	1973.48	-256.761	-0.24211	-0.19743	0.31153	-0.311514	1.07888	8.12192
						Kick0080	-830.64							g3a	1.168	3.228	97.85	331.761	458.494	797.76	2027.93		-0.24313	-0.19722	0.297132	-0.297194	0.937624	8.81045
						Kick0094	-830.641							ts3a	1.202	3.262	115.17	426.047	589.689	766.72	1799.35	-61.5642	-0.24833	-0.20069	0.430278	-0.43033	0.886232	8.89196
						Kick0070	-830.642							g4a	1.219	3.622	122.04	456.464	528.085	773.179	1700.48		-0.24231	-0.19023	0.522594	-0.522605	0.503804	8.47906
						Kick0000	-830.644							ts4a	2.288	4.438	120.46	609.815	619.15	735.147	789.003	-276.817	-0.25253	-0.19443	0.665166	-0.665426	4.45286	22.3067
						Kick0047	-830.645							g5a	3.128	3.672	83.33	555.018	574.51	587.389	814.408		-0.24347	-0.17528	0.80827	-0.808357	1.99291	22.5562
						Kick0093	-830.648							g1b	1.185	1.192	179.76	581.232	586.624	1277.92	2325.27		-0.19744	-0.15626	-0.087572	0.087578	-0.368207	-0.368563
						Kick0066	-830.648							ts1b	1.188	1.209	170.5	459.924	566.318	1220.87	2231.82	-103.908	-0.20638	-0.1649	-0.008219	0.008227	-0.282095	-0.20849
						Kick0059	-830.648
						Kick0007	-830.648
						Kick0034	-830.654																q(M5)	q(CO2)		E(M5)	E(CO2)	E_int
						Kick0036	-830.663								q(M)					q(C)	q(O)	q(O)
														M5	-0.022772	0.023373	-0.022597	0.010986	0.01103	0.327958	-0.163971	-0.163971
														g1a	-0.058058	0.025237	0.016246	-0.034968	-0.034924	0.343788	-0.123229	-0.134062	-0.086467	0.086497		-641.69	-188.923	-0.346028
														ts1a	0.013154	-0.028981	0.018904	-0.009492	-0.03016	0.318117	-0.132074	-0.149367	-0.036575	0.036676		-641.69	-188.922	-0.278415
														g2	0.135608	0.033368	0.111772	0.002843	0.002696	0.165302	-0.213794	-0.237899	0.286287	-0.286391		-641.684	-188.867	-0.0414223
														ts2a	0.072502	-0.019106	0.04768	0.047679	0.162775	0.121334	-0.124855	-0.307993	0.31153	-0.311514		-641.682	-188.654	8.12192
														g3a	0.041918	-0.015387	0.044642	0.044621	0.181338	0.120758	-0.097237	-0.320715	0.297132	-0.297194		-641.687	-188.628	8.81045
														ts3a	0.122056	-0.01067	0.079597	0.065605	0.17369	0.068147	-0.160625	-0.337852	0.430278	-0.43033		-641.69	-188.626	8.89196
														g4a	0.155484	-0.028566	0.137417	0.061043	0.197216	0.036936	-0.192647	-0.366894	0.522594	-0.522605		-641.685	-188.623	8.47906
														ts4a	0.148335	0.190631	0.040038	0.168114	0.118048	-0.028427	-0.297073	-0.339926	0.665166	-0.665426		-641.67	-188.244	22.3067
														g5a	0.131073	0.221868	0.176245	0.09116	0.187924	-0.118394	-0.330596	-0.359367	0.80827	-0.808357		-641.663	-188.138	22.5562
														g1b	0.013491	-0.042659	-0.042786	-0.013275	-0.002343	0.34409	-0.133265	-0.123247	-0.087572	0.087578		-641.692	-188.923	-0.368563
														ts1b	-0.027047	0.004822	0.022159	-0.017625	0.009472	0.301929	-0.146573	-0.147129	-0.008219	0.008227		-641.692	-188.92	-0.20849

## Sheet: Pt5 tri bipy
B3P86/sdd
a.u. to eV	27.2116
CO2	-188.923																											-188.695
Zero	-787.905
Pt5		assoc_CO2		chair_CO2		dissoc_CO2		chair_CO2_TS
Kick0024	-598.881	Kick0032	-787.89	Kick0050	-787.871	Kick0017	-787.826	Kick0010	-787.772
Kick0051	-598.913	Kick0030	-787.911	Kick0045	-787.874	Kick0022	-787.845	Kick0027	-787.79
Kick0070	-598.918	Kick0091	-787.918	Kick0061	-787.917	Kick0037	-787.863	Kick0003	-787.798
Kick0077	-598.936	Kick0045	-787.92	Kick0008	-787.917	Kick0064	-787.866	Kick0090	-787.835
Kick0073	-598.941	Kick0066	-787.922	Kick0029	-787.918	Kick0041	-787.87	Kick0094	-787.851
Kick0018	-598.945	Kick0096	-787.923	Kick0066	-787.92	Kick0046	-787.871	Kick0016	-787.905
Kick0086	-598.945	Kick0079	-787.923	Kick0053	-787.923	Kick0028	-787.873	Kick0069	-787.906
Kick0062	-598.953	Kick0065	-787.924	Kick0022	-787.924	Kick0011	-787.878	Kick0068	-787.906
Kick0032	-598.966	Kick0019	-787.924	Kick0038	-787.934	Kick0047	-787.881	Kick0039	-787.906
Kick0059	-598.966	Kick0009	-787.934	Kick0005	-787.938	Kick0093	-787.884	Kick0036	-787.923
Kick0058	-598.966	Kick0080	-787.938	Kick0003	-787.94	Kick0098	-787.89	Kick0082	-787.933
Kick0055	-598.973	Kick0003	-787.939	Kick0024	-787.941	Kick0048	-787.893	Kick0024	-787.934
Kick0088	-598.98	Kick0056	-787.94	Kick0067	-787.946	Kick0052	-787.893	Kick0079	-787.937
Kick0082	-598.98	Kick0071	-787.94	Kick0013	-787.953	Kick0070	-787.909	Kick0070	-787.939					B3P86/sdd																TPSSTPSS/Def2TZVP
Kick0068	-598.982	Kick0060	-787.944	Kick0017	-787.956	Kick0090	-787.913	Kick0005	-787.943
Kick0025	-598.982	Kick0043	-787.946	Kick0076	-787.966	Kick0057	-787.922	Kick0086	-787.954						0,1	0,3	0,5	0,7	0,9	0,11
Kick0002	-598.982	Kick0054	-787.956			Kick0036	-787.923							Pt5	-598.982	-599.007	-599.009	-599.009	-598.973	-598.876										-596.645	-596.724	-596.735	-596.717
Kick0041	-598.982	Kick0028	-787.958			Kick0061	-787.923							Pt5 + CO2	-787.905	-787.929	-787.931	-787.932	-787.896	-787.798		0	-0.665234	-0.721325	-0.736074	0.254935	2.89993			-785.34	-785.419	-785.429	-785.412		0	-2.15189	-2.44142	-1.95978
Kick0079	-598.982	Kick0069	-787.96			Kick0006	-787.924		0.515543					g1	-787.924	-787.94	-787.942	-787.922			g1	-0.515633	-0.95223	-1.014	-0.452032					-785.439	-785.456	-785.471	-785.42		-2.70191	-3.15607	-3.57867	-2.18217
Kick0023	-598.983	Kick0062	-787.966			Kick0008	-787.929							ts1	-787.935	-787.956	-787.951	-787.921			ts1	-0.827099	-1.38088	-1.24691	-0.444907			-0.311467		-785.418	-785.453	-785.449	-785.426		-2.14707	-3.09322	-2.97675	-2.35007
Kick0076	-598.984	Kick0034	-787.966			Kick0030	-787.933							g2	-787.966	-787.977	-787.982	-787.951			g2	-1.67276	-1.9703	-2.09944	-1.25352					-785.459	-785.467	-785.472	-785.446		-3.23798	-3.46139	-3.59962	-2.90001
Kick0015	-598.984					Kick0096	-787.934							ts2	-787.926	-787.946	-787.946	-787.939			ts2	-0.571458	-1.11567	-1.10936	-0.935852			1.1013		-785.429	-785.443	-785.445	-785.438		-2.4464	-2.80668	-2.87199	-2.68667
Kick0999	-598.982					Kick0085	-787.936							g3	-787.933	-787.948	-787.952	-787.934			g3	-0.768996	-1.1833	-1.2857	-0.78981					-785.442	-785.448	-785.477	-785.434		-2.77729	-2.95335	-3.7384	-2.56531
Kick0026	-598.983					Kick0001	-787.944							ts3	-787.927	-787.944	-787.947	-787.933			ts3	-0.587294	-1.05073	-1.15229	-0.755899			0.181702		-785.44	-785.45	-785.464	-785.432		-2.72559	-2.99607	-3.39635	-2.5196
Kick0021	-598.984					Kick0053	-787.945							g4	-787.96	-787.974	-787.979	-787.951			g4	-1.50444	-1.88493	-2.0121	-1.2477					-785.478	-785.481	-785.477	-785.448		-3.77976	-3.8497	-3.7482	-2.96532
						Kick0088	-787.946							ts4	-787.763	-787.769	-787.774	-787.778			ts4	3.85044	3.69798	3.57289	3.4419			5.35488		-785.28	-785.28	-785.272	-785.29		1.63181	1.62745	1.83372	1.34717
						Kick0026	-787.947							g5	-787.807	-787.811	-787.82	-787.781			g5	2.66562	2.56082	2.31186	3.38265					-785.324	-785.324	-785.324	-785.302		0.418713	0.414359	0.410277	1.01437
	-0.042178					Kick0019	-787.947
						Kick0062	-787.948
						Kick0039	-787.95								r(CO)	r(CO)	theta(OCO)	v_bend	v_bend	v_symm_stretch	v_asym_stretch	v_imag	E(HOMO)	E(LUMO)	q(M5)	q(CO2)	E_ads	E_int
						Kick0059	-787.951							M5									-0.21464	-0.16831
						Kick0074	-787.952							g1	1.185	1.192	178.33	552.173	564.178	1276.7	2336.07		-0.20602	-0.1623	-0.120835	0.121011	-0.515633	-0.547021
						Kick0049	-787.953							ts1	1.215	1.294	145.41	546.262	647.685	1066.49	1862.37	-34.2677	-0.23724	-0.19405	0.246934	-0.247102	-0.827099	0.241786
						Kick0084	-787.955							g2	1.251	1.298	133.21	573.399	767.555	1152.59	1634.21		-0.23291	-0.18442	0.295003	-0.294875	-1.67276	-0.0976567
						Kick0027	-787.956			-787.969				ts2	1.255	1.278	140.36	448.956	623.165	1079.24	1675.09	-169.544	-0.24172	-0.19034	0.26353	-0.263494	-0.571458	0.771231
						Kick0056	-787.956							g3	1.209	3.264	103.51	462.94	630.625	838.078	1764.87		-0.25787	-0.2017	0.42011	-0.420166	-0.768996	7.10687
						Kick0002	-787.956							ts3	1.189	3.252	92.49	435.996	510.321	835.265	1894.32	-227.545	-0.24824	-0.19969	0.327808	-0.327878	-0.587294	7.431
						Kick0071	-787.957							g4	1.176	4.609	116.23	404.153	524.126	873.856	2005.86		-0.25566	-0.20346	0.257433	-0.257497	-1.50444	6.45635
						Kick0072	-787.958							ts4	2.073	5.061	109.82	348.943	573.771	864.114	918.987	-313.294	-0.26258	-0.20524	0.472285	-0.472424	3.85044	20.4341
						Kick0003	-787.96							g5	3.265	4.147	106.22	469.582	640.519	864.49	1006.01		-0.26689	-0.20686	0.556295	-0.556059	2.66562	24.2412
						Kick0031	-787.962
						Kick0035	-787.962
						Kick0067	-787.964																q(M5)	q(CO2)		E(M5)	E(CO2)	E_int
						Kick0087	-787.966		1.67285						q(M)					q(C)	q(O)	q(O)
						Kick0023	-787.969							M5	-0.026083	-0.026079	0.035188	0.03525	-0.018255	0.327958	-0.163971	-0.163971
														g1	0.014694	-0.026179	0.014653	-0.086408	-0.037595	0.354569	-0.128003	-0.105555	-0.120835	0.121011		-598.981	-188.922	-0.547021
														ts1	0.076768	0.002409	0.093179	0.037726	0.036852	0.174734	-0.225043	-0.196793	0.246934	-0.247102		-598.98	-188.881	0.241786
														g2	0.021904	0.138741	0.021944	0.101787	0.010627	0.154977	-0.236217	-0.213635	0.295003	-0.294875		-598.971	-188.854	-0.0976567
														ts2	0.07759	0.054583	0.058427	0.075392	-0.002462	0.161077	-0.224872	-0.199699	0.26353	-0.263494		-598.981	-188.872	0.771231
														g3	0.076865	0.11864	0.076869	0.177929	-0.030193	0.047002	-0.16701	-0.300158	0.42011	-0.420166		-598.974	-188.625	7.10687
														ts3	0.067021	0.076741	0.067021	-0.037719	0.154744	0.081008	-0.128488	-0.280398	0.327808	-0.327878		-598.981	-188.627	7.431
														g4	0.082711	-0.004556	0.082598	-0.020777	0.117457	0.1084	-0.116088	-0.249809	0.257433	-0.257497		-598.979	-188.627	6.45635
														ts4	0.046592	0.161756	0.036624	0.137208	0.090105	0.054837	-0.253945	-0.273316	0.472285	-0.472424		-598.97	-188.301	20.4341
														g5	0.047338	0.190743	0.047566	0.16019	0.110458	0.011274	-0.291896	-0.275437	0.556295	-0.556059		-598.972	-188.119	24.2412

## Sheet: Pt5 sq pyr
B3P86/sdd
a.u. to eV	27.2116
CO2	-188.923																												-188.695
Zero	-787.905
Pt5		assoc_CO2		chair_CO2		dissoc_CO2		chair_CO2_TS
Kick0024	-598.881	Kick0061	-787.914	Kick0049	-787.815	Kick0055	-787.773	Kick0034	-787.663
Kick0051	-598.913	Kick0086	-787.918	Kick0093	-787.857	Kick0091	-787.863	Kick0028	-787.765
Kick0070	-598.918	Kick0014	-787.918	Kick0097	-787.857	Kick0047	-787.867	Kick0095	-787.791
Kick0077	-598.936	Kick0003	-787.918	Kick0046	-787.918	Kick0095	-787.867	Kick0040	-787.792
Kick0073	-598.941	Kick0098	-787.929	Kick0004	-787.918	Kick0004	-787.868	Kick0097	-787.793
Kick0018	-598.945	Kick0034	-787.936	Kick0022	-787.918	Kick0028	-787.872	Kick0007	-787.794
Kick0086	-598.945	Kick0029	-787.936	Kick0045	-787.918	Kick0060	-787.872	Kick0010	-787.794
Kick0062	-598.953	Kick0042	-787.938	Kick0067	-787.918	Kick0040	-787.874	Kick0001	-787.847
Kick0032	-598.966	Kick0047	-787.939	Kick0055	-787.936	Kick0020	-787.879	Kick0035	-787.87
Kick0059	-598.966	Kick0076	-787.94	Kick0047	-787.936	Kick0029	-787.914	Kick0011	-787.883
Kick0058	-598.966	Kick0071	-787.941	Kick0033	-787.936	Kick0099	-787.918	Kick0062	-787.884
Kick0055	-598.973	Kick0056	-787.942	Kick0018	-787.938	Kick0059	-787.918	Kick0026	-787.891
Kick0088	-598.98	Kick0054	-787.942	Kick0066	-787.941	Kick0027	-787.928	Kick0012	-787.913
Kick0082	-598.98	Kick0090	-787.942	Kick0078	-787.947	Kick0069	-787.929	Kick0081	-787.917					B3P86/sdd																	TPSSTPSS/Def2TZVP
Kick0068	-598.982	Kick0037	-787.956	Kick0098	-787.947	Kick0064	-787.937	Kick0027	-787.922
Kick0025	-598.982	Kick0062	-787.956	Kick0064	-787.955	Kick0082	-787.938	Kick0087	-787.934						0,1	0,3	0,5	0,7	0,9	0,11
Kick0002	-598.982	Kick0067	-787.958	Kick0006	-787.955	Kick0018	-787.941	Kick0086	-787.935					Pt5	-598.982	-599.005	-599.008	-599.009	-598.976	-598.872											-596.705	-596.726	-596.729	-596.732
Kick0041	-598.982			Kick0065	-787.956	Kick0021	-787.944	Kick0029	-787.936					Pt5 + CO2	-787.905	-787.927	-787.931	-787.932	-787.898	-787.795		0	-0.612748	-0.705482	-0.735219	0.184386	3.00242				-785.399	-785.42	-785.423	-785.427		0	-0.568559	-0.651555	-0.750224
Kick0079	-598.982			Kick0088	-787.956	Kick0051	-787.945	Kick0083	-787.936					p_ax	-787.918	-787.94	-787.946	-787.931			p_ax	-0.359707	-0.955554	-1.11717	-0.711967						-785.404	-785.432	-785.435	-785.44		-0.132948	-0.897621	-0.978058	-1.10048
Kick0023	-598.983			Kick0013	-787.956	Kick0025	-787.946	Kick0061	-787.94					p_eq	-787.918	-787.937	-787.946	-787.942			p_eq	-0.366957	-0.876312	-1.11718	-1.01347						-785.411	-785.453	-785.456	-785.439		-0.326286	-1.4667	-1.55571	-1.09248
Kick0076	-598.984			Kick0061	-787.957	Kick0049	-787.947	Kick0047	-787.947					g1	-787.918	-787.94	-787.946	-787.931			g1	-0.359707	-0.955554	-1.11717	-0.711967						-785.345	-785.432	-785.435	-785.44		1.47485	-0.897621	-0.978058	-1.10048
Kick0015	-598.984			Kick0079	-787.966	Kick0058	-787.947							ts1	-787.924	-787.937	-787.945	-787.934			ts1	-0.510815	-0.883827	-1.08777	-0.794153				-0.151108		-785.418	-785.43	-785.444	-785.429		-0.506726	-0.843334	-1.22764	-0.805727
Kick0999	-598.982					Kick0006	-787.951							g2	-787.936	-787.953	-787.95	-787.935			g2	-0.842539	-1.32	-1.21794	-0.807739						-785.432	-785.444	-785.449	-785.444		-0.899226	-1.2234	-1.36278	-1.21526
Kick0026	-598.983					Kick0081	-787.953							ts2	-787.896	-787.908	-787.9	-787.924			ts2	0.247095	-0.0919433	0.139997	-0.52856				1.08963		-785.386	-785.397	-785.445	-785.384		0.348235	0.0652072	-1.24152	0.401869
Kick0021	-598.984					Kick0032	-787.955							g3	-787.937	-787.963	-787.963	-787.944			g3	-0.876241	-1.57033	-1.58953	-1.04865						-785.448	-785.46	-785.459	-785.432		-1.33763	-1.64782	-1.61666	-0.894519
						Kick0062	-787.956
						Kick0012	-787.956
						Kick0071	-787.957								r(CO)	r(CO)	theta(OCO)	v_bend	v_bend	v_symm_stretch	v_asym_stretch	v_imag	E(HOMO)	E(LUMO)	q(M5)	q(CO2)	E_ads	E_int
						Kick0042	-787.96							M5									-0.20293	-0.1611
						Kick0083	-787.962							p_ax	1.186	1.195	178.48	550.943	570.33	1260.52	2309.75		-0.20088	-0.15698	-0.09476	0.094958	-0.359707	-0.376635
						Kick0066	-787.979			-787.979				p_eq	1.185	1.192	178.97	558.976	576.197	1275.95	2330.11		-0.19635	-0.15503	-0.114057	0.113993	-0.366957	-0.388674
														g1	1.186	1.195	178.48	550.943	570.33	1260.52	2309.75		-0.20088	-0.15698	-0.09476	0.094958	-0.359707	-0.376635
														ts1	1.247	1.247	145.54	570.022	652.272	1148.06	1770.14	-147.588	-0.23722	-0.18784	0.332441	-0.332452	-0.510815	0.44782
														g2	1.219	1.302	143.12	545.792	669.83	1060.55	1824.66		-0.23721	-0.19014	0.306181	-0.306181	-0.842539	0.348701
														ts2	1.217	1.98	106.89	468.348	595.793	688.39	1711.47	-275.539	-0.23516	-0.1864	0.392667	-0.392599	0.247095	7.13418
														g3	1.206	4.755	133.12	450.565	550.314	851.464	1791.86		-0.24728	-0.20701	0.383901	-0.383955	-0.876241	7.20182
																							q(M5)	q(CO2)		E(M5)	E(CO2)	E_int
															q(M)					q(C)	q(O)	q(O)
														M5	0.002391	-0.00978	0.002456	0.002454	0.002427	0.327958	-0.163971	-0.163971
														p_ax	-0.026934	-0.018424	-0.018414	-0.02926	-0.001728	0.342707	-0.133638	-0.114111	-0.09476	0.094958		-598.982	-188.922	-0.376635
														p_eq	-0.033202	-0.01789	-0.032607	-0.028045	-0.002313	0.352761	-0.11038	-0.128388	-0.114057	0.113993		-598.982	-188.922	-0.388674
														g1	-0.026934	-0.018424	-0.018414	-0.02926	-0.001728	0.342707	-0.133638	-0.114111	-0.09476	0.094958		-598.982	-188.922	-0.376635
														ts1	0.078271	0.067541	0.027074	0.081284	0.078271	0.157356	-0.244904	-0.244904	0.332441	-0.332452		-598.981	-188.886	0.44782
														g2	0.064196	0.083287	0.043062	0.045102	0.070534	0.156937	-0.217897	-0.245221	0.306181	-0.306181		-598.979	-188.875	0.348701
														ts2	-0.005317	0.112095	-0.015564	0.146479	0.154974	0.07775	-0.206317	-0.264032	0.392667	-0.392599		-598.962	-188.649	7.13418
														g3	0.033071	0.040113	0.09453	0.077629	0.138558	0.060036	-0.168918	-0.275073	0.383901	-0.383955		-598.981	-188.624	7.20182

## Sheet: Ag5
B3P86/sdd
a.u. to eV	27.2116
CO2	-188.923																								-188.695
Zero	-926.238
Ag5		assoc_CO2		chair_CO2		dissoc_CO2		chair_CO2_TS
Kick0012	-737.301	Kick0037	-926.218	Kick0044	-926.182	Kick0095	-926.018	Kick0063	-926.054
Kick0021	-737.301	Kick0095	-926.24	Kick0054	-926.23	Kick0094	-926.142	Kick0066	-926.073
Kick0069	-737.316	Kick0073	-926.241	Kick0040	-926.23	Kick0045	-926.143	Kick0042	-926.128
Kick0093	-737.316	Kick0017	-926.241	Kick0092	-926.232	Kick0032	-926.156	Kick0036	-926.145
		Kick0034	-926.241	Kick0061	-926.241	Kick0017	-926.161	Kick0061	-926.229
		Kick0040	-926.243	Kick0069	-926.241	Kick0028	-926.162
		Kick0020	-926.243	Kick0094	-926.241	Kick0029	-926.162
		Kick0061	-926.243	Kick0031	-926.243	Kick0086	-926.164
		Kick0086	-926.243	Kick0006	-926.243	Kick0037	-926.164
		Kick0098	-926.243	Kick0030	-926.244	Kick0031	-926.164							B3P86/sdd													TPSSTPSS/Def2TZVP
		Kick0042	-926.244	Kick0075	-926.244	Kick0079	-926.164
		Kick0010	-926.244	Kick0056	-926.244	Kick0064	-926.175								0,2	0,4	0,6	0,8
		Kick0035	-926.244	Kick0021	-926.249	Kick0015	-926.176							Ag5	-737.316	-737.276	-737.13	-736.911									-734.811	-734.778	-734.63	-734.433
		Kick0023	-926.244	Kick0099	-926.249	Kick0042	-926.18							Ag5 + CO2	-926.238	-926.199	-926.053	-925.833		0	1.07882	5.05557	11.0314				-923.506	-923.473	-923.325	-923.128		0	0.89635	4.93183	10.2895
						Kick0034	-926.18							g1	-926.243	-926.206	-926.056	-925.84		-0.13294	0.874971	4.96897	10.8453				-923.513	-923.48	-923.33	-923.135		-0.205521	0.71287	4.7772	10.0805
						Kick0044	-926.182							ts1	-926.237	-926.199	-926.077	-925.839		0.0381418	1.08609	4.40047	10.8583		0.171082		-923.502	-923.427	-923.326	-923.133		0.115848	2.15264	4.88495	10.142
						Kick0014	-926.182							g2	-926.249	-926.204	-926.079	-925.911		-0.288541	0.930857	4.34425	8.89909				-923.503	-923.48	-923.348	-923.181		0.0818334	0.71287	4.29419	8.83308
						Kick0057	-926.184							ts2	-926.174	-926.104	-926.05	-925.891		1.76653	3.65381	5.13499	9.46043		2.05507		-923.42	-923.367	-923.297	-923.162		2.3404	3.7886	5.69423	9.35908
						Kick0081	-926.19
						Kick0098	-926.201
						Kick0077	-926.204								r(CO)	r(CO)	theta(OCO)	v_bend	v_bend	v_symm_stretch	v_asym_stretch	v_imag	E(HOMO)	E(LUMO)	q(M5)	q(CO2)	E_ads	E_int
						Kick0016	-926.23							M5									-0.19323	-0.10833
						Kick0021	-926.243							g1	1.187	1.192	179.53	593.188	605.068	1280.51	2314.22		-0.18647	-0.10337	-0.043378	0.043408	-0.13294	-0.133323
						Kick0052	-926.243							ts1	1.199	1.217	160.9	298.097	474.834	1152.37	2120.74	-266.571	-0.19386	-0.11235	0.111745	-0.111912	0.0381418	0.298445
						Kick0082	-926.244							g2	1.235	1.283	136.77	429.353	681.026	1146.12	1696.39		-0.22775	-0.1213	0.357071	-0.357064	-0.288541	1.12853
						Kick0078	-926.249							ts2	1.164	2.327	104.89	272.911	304.403	428.055	2037.38	-56.497	-0.2379	-0.11756	0.244495	-0.244532	1.76653	9.17396
																							q(M5)	q(CO2)		E(M5)	E(CO2)	E_int
															q(M)					q(C)	q(O)	q(O)
														M5	0.015549	-0.012157	-0.012168	0.004394	0.004393	0.327958	-0.163971	-0.163971
														g1	0.010389	-0.025505	-0.031458	0.030649	-0.027453	0.335733	-0.148601	-0.143724	-0.043378	0.043408		-737.316	-188.923	-0.133323
														ts1	0.023165	0.005489	-0.014475	0.096853	0.000713	0.250679	-0.17251	-0.190081	0.111745	-0.111912		-737.316	-188.913	0.298445
														g2	0.035321	0.027993	0.033795	0.103693	0.156269	0.12634	-0.251044	-0.23236	0.357071	-0.357064		-737.311	-188.866	1.12853
														ts2	0.021375	0.010512	0.007647	0.113191	0.09177	0.134869	-0.294823	-0.084578	0.244495	-0.244532		-737.313	-188.647	9.17396

## Sheet: M5 E_capture
					Capture	assoc(OCO)	O,CO	O,C,O
		Nb5		ax	-0.316	-4.436	-2.654	-6.778
				eq	-0.483
		Mo5		ax	-0.438	-0.438	-3.26	-4.91
				eq	-0.599
		Ru5		ax	-0.361	-1.921	-2.64	-2.174
				base	-0.462
		Rh5	k0049	ax	-0.183	-1.613	-1.598	-0.083
				base	-0.282
		Rh5	k0031	ax	-0.414	-1.549	-1.976	0.094
				eq	-0.384
		Pd5		ax	-0.368	-1.34	0.94	1.993
				eq	-0.301
		Ag5		short	-0.133	-0.289	1.536
				long	-0.149
		Pt5	k0999	ax	-0.516	-1.673	-1.504	2.666
				eq	-0.493
		Pt5	k0079	ax	-0.36	-0.843	-0.876	2.666
				base	-0.367
			Capture	Capture	Associative (OCO)	O,CO	O,C,O		G_span		E(O--CO)	E(C--O)
		Nb5	-0.316	-0.483	-2.463	-4.436	-6.778		0.787827	Nb5	-2.19918	-4.06886
		Mo5	-0.438	-0.599	-0.438	-3.26	-4.91		1.16496	Mo5	-1.45509	-4.04137
		Ru5	-0.361	-0.462	-1.921	-2.64	-2.174		2.90657	Ru5	-2.03299	0.26692
		Rh5	-0.183	-0.282	-1.613	-1.598	-0.083		3.09396	Rh5	-0.220976	1.09873
		Rh5	-0.414	-0.384	-1.549	-1.976	0.094		2.44395	Pd5	1.07888	4.45286
		Pd5	-0.368	-0.301	-1.34	0.94	1.993		3.94906	Ag5	1.76653
		Ag5	-0.133	-0.149	-0.289	1.536			2.05507	Pt5	-0.571458	3.85044
		Pt5	-0.516	-0.493	-1.673	-1.504	2.666		0	Pt5
		Pt5	-0.36	-0.367	-0.843	-0.876	2.666
										Rh5 (sqpy)	-0.261549	1.19464
			Capture	Capture	Associative (OCO)	O,CO	O,C,O
		Nb5	-0.316	-0.483	-2.463	-4.436	-6.778
		Mo5	-0.438	-0.599	-0.438	-3.26	-4.91
		Ru5	-0.361	-0.462	-1.921	-2.64	-2.174
		Rh5	-0.414	-0.384	-1.613	-1.976	-0.083
		Pd5	-0.368	-0.301	-1.34	0.94	1.993
		Ag5	-0.133	-0.149	-0.289	1.536
		Pt5	-0.516	-0.493	-1.673	-1.504	2.666
												M4		M5
												E(O--CO)	E(C--O)	E(O--CO)	E(C--O)
											Nb	-1.55159	-3.67004	-2.19918	-4.06886		-0.647587	-0.398821
											Mo	-1.115	-1.77221	-1.45509	-4.04137		-0.340084	-2.26916
											Ru	-1.62219	-0.647538	-2.03299	0.26692		-0.410798	0.914458
											Rh	0.515965	1.41744	-0.220976	1.09873		-0.736941	-0.318704
											Pd	0.275845	3.41546	1.07888	4.45286		0.803034	1.0374
											Ag			1.76653			1.76653	0
											Pt	-0.122643	3.58129	-0.571458	3.85044		-0.448814	0.269155

[truncated: 1 more sheets: g1 vibs]
